1 **Title:**

2 Alternative LC-MS/MS Platforms and Data Acquisition Strategies for Proteomic Genotyping of Human  
3 Hair Shafts

4  
5 **Authors:**

6 Zachary C. Goecker<sup>1</sup>, Kevin M. Legg<sup>2</sup>, Michelle R. Salemi<sup>3</sup>, Anthony W. Herren<sup>3</sup>, Brett S. Phinney<sup>3</sup>,  
7 Heather E. McKiernan<sup>2</sup>, Glendon J. Parker<sup>1,\*</sup>

8 <sup>1</sup> Department of Environmental Toxicology, University of California, Davis, CA, USA

9 <sup>2</sup> The Center for Forensic Science Research and Education, Willow Grove, PA, USA

10 <sup>3</sup> Proteomics Core Facility, University of California, Davis, CA, USA

11 \* Corresponding author.

12 Glendon Parker PhD

13 Department of Environmental Toxicology

14 University of California – Davis

15 One Shields Ave. Davis, California 95616

16 p. (530) 752 9870

17 e. [gjparker@ucdavis.edu](mailto:gjparker@ucdavis.edu)

18

19 **Running Title:** Alternative Platforms for Proteomic Genotyping

20

21

22

23

24

## Alternative Platforms for Proteomic Genotyping

### 25 Highlights:

- 26
- Test four mass spectrometry configurations to optimize detection of genetically
- 27 variant peptides
- Technology transfer of proteomic genotyping assays
- 28
- Improved sensitivity results in higher level of forensic discrimination for human
- 29 identification using multiple reaction monitoring
- 30

31

### 32 Graphical Abstract:

33

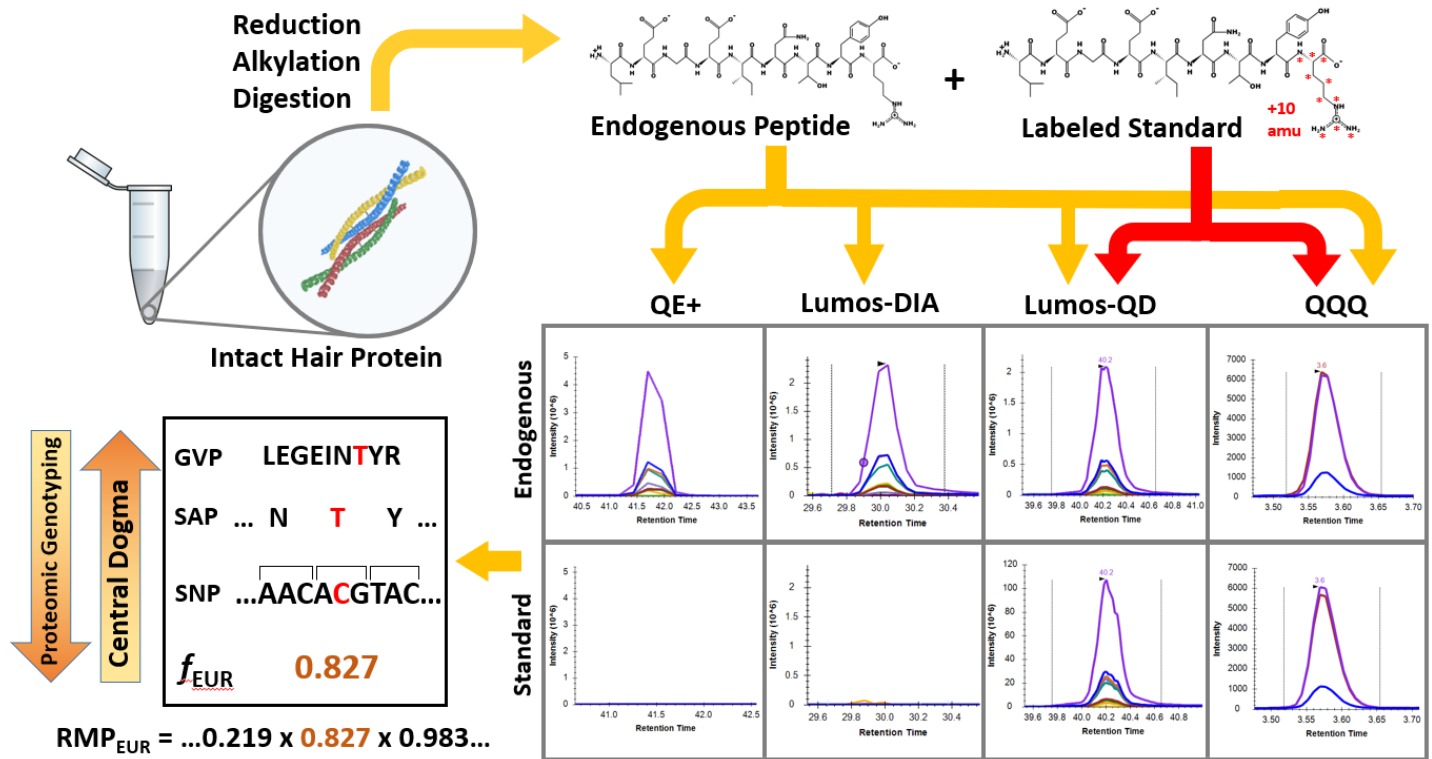

35

36

37

## Alternative Platforms for Proteomic Genotyping

### 38 **Abstract:**

39 Protein is a major component of all biological evidence. Proteomic genotyping is the use of genetically  
40 variant peptides that contain single amino acid polymorphisms to infer the genotype of matching non-  
41 synonymous single nucleotide polymorphisms for the individual who originated the protein sample. This  
42 can be used to statistically associate an individual to evidence found at a crime scene. The utility of the  
43 inferred genotype increases as the detection of genetically variant peptides increases, which is the direct  
44 result of technology transfer to mass spectrometry platforms typically available. Digests of single (2 cm)  
45 human hair shafts from three European and two African subjects were analyzed using data dependent  
46 acquisition on a Q-Exactive™ Plus Hybrid Quadrupole-Orbitrap™ system, data independent acquisition  
47 and a variant of parallel reaction monitoring on a Orbitrap Fusion™ Lumos™ Tribrid™ system, and  
48 multiple reaction monitoring on an Agilent 6495 triple quadrupole system. In our hands, average  
49 genetically variant peptide detection from a selected 24 genetically variant peptide panel increased  
50 from  $6.5 \pm 1.1$  and  $3.1 \pm 0.8$  using data dependent and independent acquisition to  $9.5 \pm 0.7$  and  $11.7 \pm$   
51  $1.7$  using parallel reaction monitoring and multiple reaction monitoring ( $p < 0.05$ ). Parallel reaction  
52 monitoring resulted in a 1.3-fold increase in detection sensitivity, and multiple reaction monitoring  
53 resulted in a 1.6-fold increase in detection sensitivity. This increase in biomarker detection has a  
54 functional impact on the statistical association of a protein sample and an individual. Increased  
55 biomarker sensitivity, using Markov Chain Monte Carlo modeling, produced a median estimated random  
56 match probability of over 1 in 10 trillion from a single hair using targeted proteomics. For parallel  
57 reaction monitoring and multiple reaction monitoring, detected genetically variant peptides were  
58 validated by the inclusion of stable isotope labeled peptides in each sample, which served also as a  
59 detection trigger. This research accomplishes two aims: the demonstration of utility for alternative  
60 analytical platforms in proteomic genotyping, and the establishment of validation methods for the  
61 evaluation of inferred genotypes.

## Alternative Platforms for Proteomic Genotyping

62 **Abbreviations:** DDA, data dependent acquisition; DIA, data independent acquisition; GVP, genetically  
63 variant peptide; HID, human identification; MRM, multiple reaction monitoring; PRM, parallel reaction  
64 monitoring; QD, QuanDirect; QQQ, triple quadrupole; RMP, random match probability; SAP, single  
65 amino acid polymorphism; SIL, stable isotope labeled; SNP, single nucleotide polymorphism

66

67 **Keywords:** Hair, Forensic Proteomics, Genetically Variant Peptides, Human Identification, Proteomic  
68 Genotyping

69

### 70 **1. Introduction**

71 Proteomics has many promising applications in a legal context, with recent advances being  
72 made in body fluid identification, drug interactions, sex estimation, and human identification (HID) [1–  
73 6]. Proteomic genotyping is the analysis of protein sequence variants, termed single amino acid  
74 polymorphisms (SAPs), to infer single nucleotide polymorphism (SNP) alleles. SNPs can be inherited and  
75 subsequently detected in peptides from digested protein [3]. These peptides, termed genetically variant  
76 peptides (GVPs), are especially useful in samples where DNA may be absent or highly degraded, such as  
77 is often the case with hair, fingerprints, and bone [7, 8]. Currently, mitochondrial DNA is the mainstay in  
78 HID for highly degraded samples and archaeological remains due to its multiplicity in each cell, rapid  
79 evolution, and familial information [9, 10]. Proteomic genotyping offers intrinsic advantages compared  
80 to other DNA-based genetic analyses. Protein, much like mitochondrial DNA, has many copies per cell.  
81 Processing of protein does not involve an amplification step or preliminary knowledge of the sequence,  
82 as is the case for DNA primer design. The peptide bond is chemically stable and common chemical  
83 modifications are predictable and accommodated by spectral matching algorithms [11, 12]. Protein has  
84 proven to outlast DNA due to degradation effects for archaeological sex estimation from teeth [6].  
85 Tryptic peptides average only 14 residues, which reduces the probability of random cleavage and

## Alternative Platforms for Proteomic Genotyping

86 information loss [13]. The stoichiometry of protein copy number is greater than DNA by up to 7 orders  
87 of magnitude with a median increase of 5 orders of magnitude, allowing for detection and analysis  
88 without amplification [14–16].

89 Initial development of proteomic genotyping has focused on hair shafts as a source of protein-  
90 based genetic information. Over 400 genetically variant peptides from hair have been identified that can  
91 predict the corresponding SNP allele [17]. Optimization to this point has focused on chemical processing  
92 to maximize peptide production from a single hair shaft [17–19]. Aside from a shift to more modern  
93 mass spectrometry instruments for data dependent acquisition, relatively little has been done to  
94 optimize data acquisition at the mass spectrometry level. Another side effect of the current focus on  
95 data dependent acquisition for proteomic genotyping is the dependence on peptide spectral matching  
96 for detection of genetically variant peptides. Peptide spectral matches, depending on the algorithm,  
97 come with a statistical expectation score or other measures of confidence [11, 12, 20–22]. For most  
98 proteomic applications this is not functional, since multiple peptides are often identified for each gene  
99 product and the level of uncertainty can be miniscule [22]. Proteomic genotyping, however, relies on  
100 single peptides to infer SNP alleles. Validation of the inferred SNPs are therefore necessary and most  
101 easily provided by direct confirmation of genotype by DNA sequencing. Validation is also possible to  
102 confirm peptide identification through the addition of stable isotope labelled (SIL) synthetic peptides  
103 into a sample digest. These standards, equivalent in sequence and chemistry to the matching  
104 endogenous peptides, behave identically to matching endogenous peptides, and do not interfere with  
105 endogenous peptide detection. The use of SIL peptides is a standard feature of targeted mass  
106 spectrometry platforms for use in triggering endogenous peptide detection and quantification [23].

107 For proteomic genotyping to be readily available to forensic investigators, it also needs to be  
108 conducted on platforms that are widely accessible to investigators. Targeted mass spectrometry using  
109 triple quadrupole systems is commonly used for many forensic toxicology analyses. It is also affordable,

## Alternative Platforms for Proteomic Genotyping

110 robust, and reproducible for both chromatography and mass spectrometry. Use of targeted methods of  
111 mass spectrometry potentially improves sensitivity and bolsters analyte identification confidence,  
112 helping to fulfill the guidelines in forensic analyte identification. Guidelines set by the scientific working  
113 group for forensic toxicology (SWGTOX) [24], European Commission (directive 96/23/EC) [25], and  
114 World Anti-Doping Agency (WADA) [26] all list a minimum number of identification points to confirm the  
115 presence of a drug or other analyte. These identification points are derived from retention time  
116 windows, peak shape, and transitions and may not be satisfied using standard proteomic discovery  
117 techniques such as data dependent acquisition (DDA) alone without DNA-based verification. Currently,  
118 proteomic genotyping in forensic science has focused on the optimization of peptide production in  
119 sample preparation, and expansion to other forensically relevant tissue sources [17, 19]. These studies  
120 have relied on shotgun mass spectrometry and nano liquid chromatography coupled with orbitrap mass  
121 spectrometry and are yet to exploit useful alternative instrumental strategies available [17, 27, 28].  
122 Here, we propose spiking SIL GVPs into hair protein digests as a means of peptide identification  
123 validation and as a mass trigger for data acquisition. This technique has typically been used for the  
124 quantification of other peptide targets [29]. A standard will elute chromatographically and be analyzed  
125 in the same time window as its corresponding endogenous GVP. Therefore, the standard and expected  
126 endogenous peptides can be directly compared in terms of retention time and ion ratios (Figures S1 and  
127 S2) providing a means for real time validation.

128         This study explores the capability and utility of alternative mass spectrometry platforms and  
129 data acquisition strategies using a panel of GVPs. Instead of a direct comparison of the platforms and  
130 acquisition methods which would involve an in-depth evaluation of instrument components, a proof of  
131 concept and evaluation of performance was studied for proteomic genotyping purposes only. Two  
132 approaches are first assessed: shotgun proteomics (DDA) on a Q Exactive™ Plus Hybrid Quadrupole-  
133 Orbitrap™ Mass Spectrometer, and data independent acquisition (DIA) on a Orbitrap Fusion™ Lumos™

## Alternative Platforms for Proteomic Genotyping

134 Tribrid™ Mass Spectrometer [30, 31]. Two other approaches were also tested in the presence of  
135 matching synthetic SIL peptide standards. These include a variant of parallel reaction monitoring (PRM),  
136 called QuanDirect™ (QD) [32] conducted on the tribrid system that uses detection of SIL standard  
137 peptides to trigger data acquisition in the mass window of the corresponding endogenous peptide, and  
138 multiple-reaction monitoring (MRM) conducted on an coupled Agilent 1290/6495 triple quadrupole  
139 system [33–37]. To provide a direct comparison in the performance of genetically variant peptide (GVP)  
140 detection between the four acquisition methods, hair from European-American (n = 3) and African-  
141 American (n = 2) subjects was tested in three biological replicates. Results reported here are limited by  
142 the procedures as performed using standard mass spectrometry platforms and protocols within the  
143 range of what is considered best practice for each method. The noted enhancements, based on a panel  
144 of 24 standard peptides, have the potential to dramatically increase both the discriminatory power of  
145 proteomic genotyping and the applicability of the method since it uses instruments and analyte  
146 detection criteria commonly found in toxicology laboratories.

147

## 148 **2. Experimental Section**

### 149 *2.1 General Experimental Design*

150 Hair shafts were collected from 5 individuals who are representative of two populous ancestral  
151 backgrounds in of the United States: European and African. The number of individuals needed for this  
152 study was minimal since this was a novel proof of concept study to demonstrate the usage of targeted  
153 proteomics for proteomic genotyping. Enough donors were used to assess reproducibility and calculate  
154 standard deviation. Three single hairs from each individual, 2 cm in length, were processed separately  
155 using a previously developed method, with a total of 15 hair digests. A blank with trypsin and without  
156 trypsin were also processed in parallel with all other digests. 24 stable isotope labeled (SIL) standard  
157 genetically variant peptides (GVPs) were spiked into the hair digests for parallel reaction monitoring and

## Alternative Platforms for Proteomic Genotyping

158 multiple reaction monitoring (Table S1). Raw mass spectral data were processed using the Skyline  
159 software for the 24 GVPs of interest and their corresponding heavy-isotope peptide standards. 24  
160 peptides were chosen to adequately represent the diversity of the full set of 408 currently identified  
161 GVPs in terms of detection sensitivity, length, and composition. Basic statistical analyses were  
162 conducted such as standard deviation, random match probability, false discovery rate ( $FP/(FP+TP)$ ), and  
163 detection sensitivity ( $TP/(TP+FN)$ ) to compare the three analytical methodologies. Random match  
164 probability calculations were estimated using the procedure outlined in Parker et al [3].

165

### 166 *2.2 Hair Collection and Processing*

167 Samples used in this study were prepared as part of an earlier study [17]. Briefly, five individuals  
168 were analyzed: three subjects of European (Davis, CA) and two subjects of African genetic background,  
169 respectively (Sorenson Forensics LLC, Salt Lake City, UT). Hair and saliva were collected using protocols  
170 compliant with the Institutional Review Board at the University of California, Davis (IRB# 832726). Hairs  
171 were collected by cutting a few inches inward from the distal end, therefore excluding the roots. The  
172 length of hair on the head before cutting was roughly 10 cm. Hair shafts were further cut to a length of  
173 20 mm before continuing with protein extraction [17]. The African hair samples weighed almost half of  
174 the weight of the European hair samples due to differences in hair shaft width and shape (data not  
175 shown). Hair shafts were biochemically processed using an optimized processing protocol as part of an  
176 earlier study [17]. After initial preparation and use of the samples to generate the data-dependent  
177 acquisition datasets used in the cited study, the remaining supernatants were stored at -20°C. Prior to  
178 mass spectrometric analysis, the samples were again centrifuged to minimize insoluble particulates in  
179 the supernatant.

180

### 181 *2.3 Selection of a Panel of Stable Isotope Labeled Genetically Variant Peptides*



## Alternative Platforms for Proteomic Genotyping

182 A panel of 24 highly characterized GVPs from 12 loci was selected to represent a wide range of  
183 potential sensitivities, from rarely to frequently detected, and were well characterized over a range of  
184 studies and laboratory groups [3, 17, 19, 27, 38]. The peptides selected range from 8 to 21 amino acids  
185 in length and were all modified with stable isotopes at the C-terminal lysine (+8 Da) or arginine (+10 Da)  
186 (JPT peptide technologies, Acton, MA) (Table 1). The peptides (14 nmol/well) were subsequently  
187 suspended in 4  $\mu$ L of 70% formic acid and 136  $\mu$ L of 0.1% trifluoroacetic acid. 10  $\mu$ L of each standard  
188 were pooled to make a concentration of 4.16 pmol/ $\mu$ L per standard. The pooled sample was then  
189 purified using a silica C18 macrospin column with loading capacity of 30-300  $\mu$ g of peptide material (The  
190 Nest Group, Southborough, MA). Briefly, the peptide digests were loaded onto the column and spun,  
191 the column was washed with 0.1% trifluoroacetic acid and spun three times, and the peptides were  
192 eluted using 80% acetonitrile 0.5% formic acid and spinning and were subsequently dried down. This  
193 pool was then injected into four hair digests from two individuals at 1 and 2 fmol/ $\mu$ L. A second pool was  
194 then created, with normalization based on peak area to make a final spike mixture (Table S1). This final  
195 spike solution consisted of a total of 433 nmol of peptides in 1 mL final volume (433 pmol/ $\mu$ L). The final  
196 mixture (1 fmol) was included in each sample injection for QuanDirect analysis and 73 pmol of the final  
197 mixture was injected into each sample for MRM analysis on the triple quadrupole (QQQ) platform.

198

### 199 *2.4 Instrumental Analysis*

200 Before applying the samples to LC-MS/MS, solubilized tryptic peptides were quantified using the  
201 Pierce™ Quantitative Fluorometric Peptide Assay (ThermoFisher) as reported in previous work [17].  
202 Resulting data were used to determine how much material to apply to the instrument. For the Q  
203 Exactive Plus and Fusion Lumos, this amounted to 0.75  $\mu$ g of peptide digest material. Digest injection  
204 volume was held constant on the QQQ platform, but volumes varied based on concentration for the  
205 other three platforms.

## Alternative Platforms for Proteomic Genotyping

206            Three instruments were used to conduct four data acquisition methods (Figure 1). The first  
207 analysis method (QE+) was conducted on a Q Exactive Plus nLC-MS/MS platform which employed data  
208 dependent acquisition (DDA). This method was established as part of an earlier study [17]. For the  
209 second analysis (Lumos-DIA), samples were analyzed on a Thermo Scientific Fusion Lumos mass  
210 spectrometer and was connected to a Dionex nano Ultimate 3000 (Thermo Scientific) with a Thermo  
211 Easy-Spray source. The acquisition method was set to data independent acquisition (DIA). For this  
212 method, peptides were trapped and separated on a 100  $\mu\text{m}$  x 250 mm C18 column with 3  $\mu\text{m}$  particle  
213 size PepMap Easy-Spray (Thermo Scientific) using a Dionex Ultimate 3000 nUPLC at 200nl/min. Peptides  
214 were eluted using a 90 min gradient of 0.1% formic acid (A) and 80% acetonitrile (B). Gradient conditions  
215 include 2% B to 50% B over 60 minutes, followed by a 50%-99% B in 6 minutes and then held for 3  
216 minutes, then 99% B to 2% B in 2 minutes. The mass spectrometer was run in DIA mode using a collision  
217 energy of 35, resolution of 30K, maximum inject time of 54 ms and an automatic gain control (AGC)  
218 target of 50,000. Each individual sample was run in DIA mode with staggered isolation  
219 windows of 12 Da in the range 400-1000 m/z. For each analytic sample, the individual sample was run in  
220 DIA mode using the same settings as the chromatogram library runs except using staggered isolation  
221 windows of 8 Da in the m/z range 400-1000 m/z.

222            The third analysis method (Lumos-QD) was conducted on the same instrument as the Lumos-  
223 DIA method, except QuanDirect™ (QD) parallel reaction monitoring acquisition was employed. For this  
224 method, the digested peptides were reconstituted in 2% acetonitrile/0.1% trifluoroacetic acid and 1  $\mu\text{g}$   
225 in 5  $\mu\text{l}$  of each sample was loaded onto a 75  $\mu\text{m}$  x 20 mm PepMap 100Å 3U trap (Thermo Fisher  
226 Scientific) where they were desalted online before being separated on a 50  $\mu\text{m}$  x 150 mm 100 Å 2U  
227 PepMap EasySpray column (Thermo Fisher Scientific). Peptides were eluted using a 90 min gradient of  
228 0.1% formic acid (A) and 80% acetonitrile (B) with a flow rate of 200nL/min. Gradient conditions include  
229 2% to 50% B over 66 min, 50% to 99% B over 2 min, and then held at 99% B for 4 min, followed by 99%

## Alternative Platforms for Proteomic Genotyping

230 to 2% B over 2 min. Targeted precursors were interrogated for a maximum 3 sec cycle. The target list  
231 consisted of the  $m/z$  ratios and charge states of the heavy peptides (Table 1) only since no retention  
232 time info was required. The QuanDirect™ method of targeted mass spectrometry was used to search for  
233 endogenous GVPs [32, 39]. To trigger a data-dependent scan, the precursor must match the expected  
234 charge state and the  $m/z$  within 10 ppm. These precursors were interrogated with a short SRM scan  
235 ( $MS^2$  IT HCD) of the predicted  $y_1$  fragment ion region for the expected heavy R (180-190  $m/z$ ) or heavy K  
236 (150-160  $m/z$ ) peptides. The  $y_1$  fragment in proteomics determines the C-terminus ending and is more  
237 easily identifiable in a mass spectrum due to its monomeric independence. The ultra-fast SRM scans  
238 were performed using a 10  $m/z$  mass range, rapid ion trap scan rate, HCD NCE 40%, 0.7  $m/z$  isolation  
239 window, AGC target 1E4, and a max IT of 10 ms. The  $y_1$  ion in the SRM scan must be above an intensity  
240 threshold of 1000 and within 1 Da of the expected  $m/z$ . If the expected heavy  $y_1$  fragment ion was  
241 detected in the SRM scan, 185.1 (heavy R) or 155.1 (heavy K), then full HRAM HCD MS/MS scans were  
242 triggered on the spiked-in heavy peptide as well as the endogenous form (Table S2). These scans use the  
243 following parameters: scan range 150-1500  $m/z$ , 60K resolution, 30% NCE HCD, AGC target 2e5, and max  
244 IT of 110 ms. To trigger on the endogenous peptide, an  $m/z$  offset of -5 or -4 U was used for the R and K  
245 peptides, respectively.

246 For the fourth analysis (QQQ), samples were analyzed via multiple reaction monitoring  
247 acquisition using an Agilent 1290 Infinity series HPLC system, coupled to an Agilent 6495 triple  
248 quadrupole mass spectrometer with an Agilent Jet Stream source. 10  $\mu$ L of a 1:10 spike:digest (v/v) ratio  
249 (~15  $\mu$ g digested material and 291 pg of spike) was loaded on a 2.1 mm  $\times$  100 mm, 2.7  $\mu$ m AdvanceBio  
250 Peptide Map fused-core silica column (Agilent), and separated over a 15 min gradient at 400  $\mu$ L/min.  
251 The solvent gradient for the elution of peptides began with 5% ACN and increased to 35% ACN at 11  
252 min, 65% ACN at 12.5 min, and 90% ACN at 13 min and held for 2 min, and then reduced to 5% for 5 min  
253 to re-equilibrate the column. Source conditions included a gas temperature at 150°C at a flow rate of 11

## Alternative Platforms for Proteomic Genotyping

254 l/min, nebulizer pressure of 30 psi, sheath gas temperature of 150°C at 10 l/min, and a capillary voltage  
255 of 3500 V. Collision energies were calculated based on precursor  $m/z$  and charge state in Skyline  
256 software, and were not fully optimized. Data were acquired in positive dynamic MRM mode (dMRM)  
257 with an  $MS^1$  resolution set to wide and  $MS^2$  resolution to unit, retention time window of 30 sec, and a  
258 cycle time of 500 ms. Three transitions were selected for the detection of each standard and  
259 endogenous peptide (Table S3).

260

### 261 *2.5 Software Analysis*

262 To make the resulting QuanDirect™ PRM datafiles amenable with Skyline software, spectra from  
263 the linear ion trap were excised using the FT RecalOffline tool from Xcalibur™ (ThermoFisher Inc.). This  
264 treatment does not interfere with spectrum interpretation since this was only a part of the internal  
265 decision tree. Raw files were manually loaded and the external slicer was called, under Rawfile  
266 Functions, from within RecalOffline to remove any masses below 200  $m/z$  using a mass filter from 200  
267  $m/z$  to 2000  $m/z$ . Since only low mass  $y_1$  fragments of 185 and 155  $m/z$  with scan range < 200  $m/z$  were  
268 searched for, the filter removed all of the ion trap data from the file. The resulting file only contained  
269  $MS^1$  and  $MS^2$  orbitrap data which was used to analyze endogenous and standard peptides.

270 Skyline software [40] (version 20.1) was used to visualize endogenous peptide data and SIL  
271 peptide data simultaneously and to extract only mass transitions of interest (Tables S2 and S3). Positive  
272 peptide identification required a  $s/n$  ratio > 3, peak intensity of ion targets > 20 counts, and an ion ratio  
273 between quantifier and qualifier ions within 25% of the target. These parameters were chosen to meet  
274 minimum identification points from common forensic guidelines [24–26]. For the analysis performed  
275 here, samples were analyzed in batches based on the instrumentation on which they were run. For  
276 samples analyzed on the QE+ using DDA, full-scan transition settings for  $MS^1$  filtering were set to include  
277 count isotope peaks, orbitrap precursor mass analyzer, with 3 peaks and a resolving power set to 60,000

## Alternative Platforms for Proteomic Genotyping

278 at 400  $m/z$ . MS/MS filtering settings were set to DDA as the acquisition method, orbitrap product mass  
279 analyzer, no isolation scheme, a resolving power set to 60,000 at 400  $m/z$ . All other settings were set to  
280 default. For samples analyzed using Lumos-DIA, the same settings were used as DDA with the exception  
281 of 70,000  $MS^1$  resolving power, DIA as the acquisition method, results only as the isolation scheme, and  
282 17,500 as the MS/MS resolving power. For samples analyzed using Lumos-QD, the same settings were  
283 used as Lumos-DIA except for no isotope peaks, MS/MS filtering settings were set to targeted as the  
284 acquisition method, and no isolation scheme. For samples analyzed using QQQ with MRM, the same  
285 settings were used as PRM except for  $MS^1$  filtering were set to include count isotope peaks. One  
286 precursor and 3 transitions were chosen for MRM analysis, while one precursor and 10-24 transitions  
287 were chosen for the PRM analysis and DDA analysis. These are both above the minimum standard  
288 guideline for the number of ions required for a positive identification [25, 26].

289 Positive peptide identifications were called from the Skyline software based on precursor and  
290 transition signal to noise ratio, retention time, transition masses, and ion ratios. For retention time, this  
291 identification criteria included having a GVP retention time within 2% or  $\pm 0.1$  min of the labeled  
292 standard. For the DIA and DDA approaches, comparison of retention time to a labeled standard was not  
293 used. In terms of signal to noise ratio, a minimum ratio of 3:1 was used as the threshold for data from all  
294 platforms. Transitions used for identification for the targeted approaches were taken from the most  
295 abundant transitions for the labeled standard peptides. The untargeted methods utilized the Prosit  
296 library [41] to compare both transitions for identification and ion ratios. For all acquisition  
297 methodologies, ion ratio maximum tolerance windows were set to be within 10% of the relative  
298 abundance of the compared ion, so long as the peak is at least 50% of the base peak [26]. The PRM and  
299 MRM methods used the labeled standard peptides as a reference and the DDA and DIA methods used  
300 the Prosit library as the reference for ion ratios.

301

## Alternative Platforms for Proteomic Genotyping

### 302 2.6 Statistical Analysis

303 GVP Finder (v1.2) (<https://www.parkerlab.ucdavis.edu>) was used to estimate random match  
304 probabilities (RMPs). This is an excel spreadsheet compatible with X!Tandem output developed in  
305 previous work [17]. In short, RMP was calculated using the product rule [3, 42] by simply multiplying  
306 independent genotypic frequencies based on observations on individual genotypes from the major  
307 populations in the 1000 Genome Project Consortium [43]. To account for linkage disequilibrium, it was  
308 assumed that there was complete linkage for GVPs shared within an open reading frame and complete  
309 independence between each open reading frame [3]. For GVPs that were determined to be genetically  
310 linked within an open reading frame, a cumulative genotypic frequency was calculated by counting the  
311 number of individuals in the consortium who have the same gene specific GVP profile as was obtained  
312 from the sample and dividing by the total number of individuals in the population. Genetic validation  
313 was performed to assign trueness of positive and negative detections. Genomic DNA was extracted and  
314 sequenced as reported in previous work [17].

315 To estimate random match probability of a profile that would result from a targeted QQQ  
316 analysis using all known GVPs, and assuming equivalent detection sensitivity obtained from the panel, a  
317 Markov Chain Monte Carlo (MCMC) model was developed. MCMC is an algorithm that simulates  
318 stochastic processes such as sampling from a probability distribution [44, 45]. This method of sampling  
319 allows an estimation of true population probability distributions by randomly sampling from  
320 probabilistic data. For this study, MCMC was developed as a function of GVP number and validated by  
321 superimposing actual RMP values from previous studies. The probability distributions were taken from  
322 actual genotype frequencies from the 408 GVPs that have been identified. A theoretical genotype of  
323 non-synonymous SNP alleles was generated based on randomly selecting known GVPs and randomly  
324 determining if a theoretical genotype would include that GVP based off its genotype frequency. One  
325 hundred iterations were included in this model. Minimum, maximum, and median theoretical RMP

## Alternative Platforms for Proteomic Genotyping

326 values were estimated based on which theoretical GVPs were randomly chosen in the model. The model  
327 assumes one GVP locus per open reading frame. The resulting modelled genotypes were randomly  
328 selected in each iteration as a function of prior probability based on the genotype frequency chosen  
329 randomly here, rather than favoring GVPs of historically higher detection. Therefore, this model is not  
330 biased towards specific GVPs and does not mimic biological GVP profile distributions.

331

### 332 *2.7 Data Reporting and Availability*

333 All RAW data files containing detected endogenous peptides and SIL GVPs from hair digests  
334 mentioned in this work, including from the supplemental section, are publicly available on  
335 ProteomeXchange (PXD024651) [46]. A complete list of datafiles is also available (Table S4). Files from  
336 QE+ are comprehensive and include all detected ions, whereas the Lumos-QD and QQQ files are limited  
337 to ions corresponding to GVPs from the panel. Lumos-QD data are modified to exclude linear ion trap  
338 data. Skyline files for data obtained from the four analytical platforms are publicly available at  
339 <https://panoramaweb.org/TargetedGVP.url> [47].

340

## 341 **3. Results and Discussion**

342 Studies optimizing the detection of genetically variant peptides (GVPs) have done so by focusing  
343 on the chemical release of tryptic peptides from the hair matrix, or by applying the resulting peptide  
344 mixtures to more sensitive instrumentation. In this study different mass spectrometry data acquisition  
345 methods were tested to evaluate additional options for increased GVP detection and therefore further  
346 increase the utility of proteomic genotyping in forensic investigation. Accordingly, mass spectrometry  
347 data acquisition using Data Independent Acquisition (DIA), Parallel Reaction Monitoring (PRM) and  
348 Multiple Reaction Monitoring (MRM) were all tested on instruments with configurations that are  
349 standard for each method. Acquired data from all three platforms, as well as existing data using a

## Alternative Platforms for Proteomic Genotyping

350 shotgun proteomics Data Dependent Acquisition (DDA) approach, were screened for detection of a  
351 panel of 24 endogenous GVPs in replicate trypsin digests using a common bioinformatic workflow in  
352 Skyline (Figures 2, 3, and S1). The cumulative inferred non-synonymous SNP genotypes were directly  
353 validated using the exome of each subject (Figure 3) to determine basic metrics such as true positive,  
354 false positive, true negative, and false negative rates, along with sensitivity ( $TP/(TP+FN)$ ) and false  
355 discovery rates ( $FP/(FP+TP)$ ). Besides this binary classification process, other metrics such as signal to  
356 noise, peak shape, ion ratio, peptide ionization efficiency, retention time, and abundant transitions were  
357 also measured. In the case of the PRM and MRM acquisition methods, the evaluation was facilitated by  
358 using a panel of exogenous stable isotope labeled peptides. While each data acquisition approach was  
359 within the range of normal best practice, no systematic optimization occurred beyond establishing basic  
360 acquisition and chromatographic parameters. The results therefore reflect different chromatographic,  
361 ionization, and mass spectrometer systems and configurations for each acquisition method. While direct  
362 comparisons could not be made, the performance of each method could be individually evaluated in  
363 comparison to previously acquired data using shotgun proteomics (DDA).

364

### 365 *3.1 Analysis of Performance for the QE+ Platform*

366 Data previously acquired on a nano-LC / Q Exactive Plus (QE+) platform with data dependent  
367 acquisition (DDA) was reanalyzed using Skyline software (version 20.1) to provide a benchmark for other  
368 data acquisition strategies and instrument configurations [17, 40]. The percentage of true positive  
369 shotgun proteomic identifications for the QE+ platform was 26.4% and the detection sensitivity  
370 ( $TP/(TP+FN)$ ) was 43.2% (Figure 3). The false discovery rate ( $FP/(FP+TP)$ ) was the lowest for the QE+  
371 platform at 2.6% and the average GVP detection from the 24-GVP panel was  $6.5 \pm 1.1$  (Figure 3). Ten of  
372 the 24 endogenous peptides were not detected at all using this platform. These peptides include  
373 GILVDTSR, ALETVQER, ALETQER, EWSTFAVGPQHCLQLNDR, GVALSNVIHK, and GVALSNVVHK from



## Alternative Platforms for Proteomic Genotyping

374 proteins HEXB, GSDMA, NEU2, and SERPINB5 (Figures 3 and S3). These peptides may not have been  
375 observed due to low protein abundance in the hair sample digests, whereas keratin proteins are very  
376 abundant [48]. No peptides were observed using this method that were not also observed in the other  
377 methods. Four endogenous peptides were not detected at all in this study regardless of the platform  
378 used: VSAMYSSSSCKLPSLSPVAR, VSAMYSSSPCKLPSLSPVAR, EHCSACGPLSQLLVK, and  
379 EWSTFAVGPQHCLQLHDR. These longer peptides may be more challenging to detect based on their  
380 length and residue composition [49]. For a positive detection, the average signal to noise ratio was  
381 higher than 1:3 (Figure 2, S5), defined as the variance of amplitude of the baseline and signal was the  
382 amplitude of the peak as measured from the apex to the average baseline, which meets the minimum  
383 requirements in toxicology scientific working group guidelines [24–26]. The nanoflow chromatography /  
384 Q-Exactive configuration used in this analysis was sensitive [50], requiring only 1 µg of the roughly 100  
385 µg protein present in 2 cm of a single hair shaft [51]. This acquisition method can be used for GVP  
386 discovery and provide a resource for retrospective analysis of GVPs, although the analysis was limited to  
387 the 24 GVPs and associated ions in the SIL-peptide panel. In terms of the peak shape for the QE+  
388 analytical platform, the overall form differs from the three other platforms due to differences in  
389 chromatography (Figure 2). Complex chromatography patterns due to internal prolines were detected  
390 [52, 53].

391

### 392 *3.2 Analysis of Performance for the Lumos-DIA Platform*

393 For Data Independent Acquisition (DIA), samples were applied to a Dionex nano Ultimate 3000  
394 coupled to an Orbitrap Fusion™ Lumos™ Tribrid™ Mass Spectrometer and data acquired using SWATH-  
395 MS (DIA) (Figure 1). Overall, Lumos-DIA peaks appear sharp with peak intensities averaging at  $1 \times 10^3$   
396 and the average signal to noise ratio was also above 1:10 (Figure 2). The resulting percentage of true  
397 positive identifications for Lumos-DIA was 13.2% and the false discovery rate was 5.0% (Figure 3).

## Alternative Platforms for Proteomic Genotyping

398 Average GVP detection from the 24-GVP panel was rather low, at  $3.1 \pm 0.8$  and therefore detection  
399 sensitivity (TP/(TP+FN)) was also low, at 21.6% (Figure 3 and S3) which is less than half the sensitivity we  
400 typically achieve using standard DDA methodologies on the QE+. Overall, this method did not detect 15  
401 of the 20 peptides that were detected using the other methodologies. Seven of these 15 missing  
402 peptides were found in all three other methodologies, which include peptides DSQECILmETEAR,  
403 LEGEINmRY, EHCSACGPLSR, DLNMDCmVAEIK, DLNMDCIVAEIK, GAFLYPCGVSTPVLSTGVLR, and  
404 GAFLYdPCGVSTPVLSTGVLR from KRT39, KRT32, KRT39, KRT83, and KRT82 (Figures 3 and S3). Only one  
405 peptide was observed using the Lumos-DIA methods that was not observed in either PRM or MRM  
406 method for the same donor; AKPLEQAVAAIVCTFQEYAGR.

407 DIA requires little method optimization [30, 54], and may be used for GVP scouting or  
408 retrospective use. Unbiased detection of peptides, uniquely for DIA, allows for proteins of low  
409 abundance to be detected [31]. This precludes the need for an exclusion list or other mass filtering  
410 parameter optimizations. The data is highly reproducible [31] and so running evidence samples  
411 alongside exemplars would be more consistent and would result in less variance due to protein  
412 abundance levels [55]. The main challenge in DIA interpretation, at least in our hands, was  
413 deconvolution of  $MS^2$  spectra. In this data false positive identification occurred in four peptides that  
414 were not explained by instrument carry-over or genetics. Due to the nature of SWATH mass  
415 spectrometry, an  $MS^2$  mass spectrum may contain product ions from multiple precursor ions, which may  
416 lead to convoluted  $MS^2$  extracted ion chromatograms. This may be problematic in a courtroom setting,  
417 although the use of the internal standard SIL peptides would have significantly aided  $MS^2$   
418 interpretation. The sensitivity of this analysis may also be improved with better precursor validation,  
419 library match validation, and staggered SWATH windows [56].

420

421 *3.3 Analysis of Performance for the Lumos-QD Platform*

## Alternative Platforms for Proteomic Genotyping

422 Targeted parallel reaction monitoring (PRM) was evaluated by analysis of replicate digests using  
423 an analytical variant called QuanDirect™ (QD) (Figure 1) [32]. This method differs from classical PRM by  
424 triggering data acquisition using detection of the  $y_1$  SIL amino acid instead of characterized retention  
425 times. The resulting percentage of true positive identifications for Lumos-QD was 33.3% and the false  
426 discovery rate was also highest, at 12.7% (Figure 3). The high false discovery rate was due to higher  
427 levels of carry-over of the peptides GVALSNVIHK, GVALSNVVHK, and DLNMDCMVAEIK, including in the  
428 blanks. Average GVP detection from the 24-GVP panel was  $9.5 \pm 0.7$  and detection sensitivity  
429 (TP/(TP+FN)) was 54.5% (Figure 3 and S3). Overall, the methodologies we applied to the Lumos-QD  
430 platform revealed a 1.3-fold increase in detection sensitivity in comparison to the traditional  
431 methodologies we applied to the QE+ platform (Figure 3). However, the peptides  
432 ARPLEQAVAAIVCTFQEYAGR and AKPLEQAVAAIVCTFQEYAGR were both detected inconsistently in the  
433 Lumos-QD series when compared to the three other methods.

434 Overall, Lumos-QD peaks appear sharp and symmetrical with peak intensities that averaged at  
435 three orders of magnitude and an ion current signal to noise ratio above 1:10 (Figure 2). As expected,  
436 peaks identified using Lumos-QD were less stable in retention time. Standard peptide peaks drifted  
437 between runs by an average variance of 20 sec (or 0.4% of total run time), which is longer than the  
438 average peak width of 15 sec (or 0.3% total run time) (Figure S2). Peak variance was on average 1.5x  
439 larger for the Lumos-QD method compared to the QQQ method, described below. Peak drift between a  
440 standard peptide and its corresponding endogenous peptide in each run was minimal for both PRM and  
441 MRM analyses (Figure S2B/C).

442 The QuanDirect method addresses a major weakness of PRM, namely retention time variability  
443 that results from low flow chromatography. The more recent SureQuant methodology [57] continues  
444 this mass triggering approach by searching for the internal standard precursor ion in a fast and low-  
445 resolution watch mode and switches to a high-resolution quantitative mode when the isotope-labeled

## Alternative Platforms for Proteomic Genotyping

446 precursor ion is detected [57]. For QD, not having to pre-determine strict elution windows saves time  
447 and effort. However, the traditional PRM methodology when it is optimized, and takes full advantages of  
448 SIL characteristics and instrument cycle windows, and may be more sensitive and optimized. The PRM  
449 acquisition method is easier to establish since it is not limited by prior identification of targeted  
450 transitions. Of course, targeted acquisition only acquires limited information and therefore cannot be  
451 used retrospectively.

452

### 453 *3.4 Analysis of Performance for the QQQ Platform*

454 Multiple reaction monitoring (MRM) was conducted using an Agilent 1290 Infinity series HPLC  
455 system coupled to an Agilent 6495 triple quadrupole mass spectrometer (Figure 1). In this targeted  
456 acquisition experiment, a panel of 24 SIL GVPs (Table 1, Figure S4) was added to provide a direct  
457 comparison of transition signals and retention times for endogenous GVPs. The resulting percentage of  
458 true positive identification was 42.4% and the false discovery rate ( $FP/(FP+TP)$ ) was 4.7% (Figure 3).  
459 Average GVP detection from the 24-GVP panel was  $11.7 \pm 1.7$  and detection sensitivity ( $TP/(TP+FN)$ )  
460 increased to 69.3% (Figure 3 and S3). Overall, the methodologies we applied to the QQQ platform  
461 revealed a 1.6-fold increase in detection sensitivity in comparison to the traditional methodology we  
462 applied to the QE+ platform. Peak shape was more uniform in the QQQ run where retention time drifted  
463 between runs by an average variance of 1.5 sec, which is shorter than the average peak width (4.8 sec)  
464 (Figure S2A). Peak drift between a standard peptide and its corresponding endogenous peptide in each  
465 run was minimal (Figure S2B/C). The average signal to noise ratio for QQQ was lower and the overall  
466 detected peak intensities were lower by an average of 3 orders of magnitude.

467 The QQQ method resulted in noisier peaks due to the smaller number of transitions selected,  
468 lower mass accuracy, and shorter run times that may have resulted in overlap with extraneous ions.

## Alternative Platforms for Proteomic Genotyping

469 However, the QQQ system provided the greatest increase in sensitivity. In terms of method  
470 development, MRM on a QQQ system requires more development to deal with limited selection of  
471 transition masses, detection parameters and manual optimization of acquisition parameters such as  
472 collision energy, retention windows, dwell time, duty cycle, and cycle time. In terms of input material,  
473 the QE+, Lumos-DIA, and Lumos-QD methods are all the same, with 1  $\mu\text{g}$  of material injected due to  
474 their use of nano-LC. However, the QQQ system used a volume of 10  $\mu\text{L}$ , which averaged to  $\sim 15 \mu\text{g}$  of  
475 digested peptide material. This is a 15-fold increase in starting material, but still only 10 to 20% of a  
476 protein digest from a single hair shaft (20 mm). The MRM method depends on a limited number of  
477 transitions for identification. The performance of each transition therefore needs to be individually  
478 evaluated and alternative transitions selected as necessary. Selection of the target GVP for a given non-  
479 synonymous SNP is also a major consideration. The current approach to proteomic genotyping is based  
480 on shotgun proteomics that allows genotype inference to occur from several chemical variants, or  
481 'peptidoforms', of a GVP [31, 58, 59]. These result from expected but variable environmental chemical  
482 modifications such as deamination, methionine oxidation and N-terminal acetylation. Selection of a  
483 representative peptide will ideally occur from the peptidoform with the highest signal from samples  
484 derived from a range of real-world contexts.

485 The false positives identified in this study have three potential causes. The first category is  
486 genetic. This class of false positive is demonstrated by the peptide in K32 protein containing the SAP  
487 T395M. An uncommon variant in K40 (W390R) results in the same genetically variant peptide sequence,  
488 which was positively identified in subject E2. As described earlier, the second class of false positive  
489 detection is due to instrument carry-over. SerpinB5 and K83 found in Lumos-QD may exemplify this  
490 since these were also found in the method blanks and not in reagent blanks. These most likely reflect  
491 instrument carry-over and not reagent contamination due to the low peptide abundance. The  
492 associated peaks are smaller than that observed in other true positive hair shaft digests by more than

## Alternative Platforms for Proteomic Genotyping

493 two orders of magnitude (data not shown). The degree of carry-over for any peptide marker can be  
494 factored into appropriate thresholds during the development process for designating a positive  
495 detection of endogenous GVP [24–26]. Assessment of inter-sample blanks is a crucial step which must  
496 be included. Caution should be used to avoid a third category of false positive detection involving data  
497 interpretation.

498         The presence of false positive assignments, or potential assignments, raises the issue of peptide  
499 validation and what constitutes a positive determination. In targeted proteomics, positive determination  
500 is more straightforward. If the retention time, precursor ion ratios, product ion ratios, and mass errors  
501 are consistent to those of the SIL standard within a certain range, then the peptide is positively assigned.  
502 If one of these aspects is missing, then it is still possible to validate through the other measures. For  
503 example, precursor ions are missing for many GVPs in the Lumos-QD analysis including HEXB 207I,  
504 GSDMA 128L, and K39 456R. However, other measurements such as product ion ratios (data not shown)  
505 and retention times (Figure S2) are consistent with the standard. Therefore, these are considered  
506 positive assignments. Without the use of SIL standards, as we see with the QE+ and Lumos-DIA methods,  
507 this is not a straightforward task. As a first step of validation, a library may be used to compare  
508 precursor and product ions. In this analysis, we use Prosit [41] as a guideline for ion ratio comparison.

509         Traditional QQQ platforms differ significantly from research mass spectrometry platforms in  
510 chromatography and ionization. The QQQ platform used here employs an analytical column with  
511 dimensions of 2.1 mm x 100 mm and a flowrate of 400  $\mu$ L/min. This platform also employs an Agilent jet  
512 stream ion source, which offers improved instrumental sensitivity, but is not as sensitive as nanospray  
513 sources. This is in comparison to the nano-LC systems of QE+ and Lumos which used column dimensions  
514 of sub-100  $\mu$ m diameter and 150-250 mm lengths and a flow rates of 200-300 nL/min. These smaller  
515 diameter columns with slower flow rates offer enhanced instrumental sensitivity due to entering the  
516 column in a more concentrated band, therefore lessening radial dilution [50]. Using nanoflow columns,

## Alternative Platforms for Proteomic Genotyping

517 ion suppression effects and scan rate limitations are reduced, and the system is more responsive to  
518 temperature changes. When considering time efficiency, analytical columns offer the advantage of 15-  
519 minute proteomic runs while the nanoflow systems offer around 90 minute runs. In a non-research  
520 environment where time is crucial, and especially when dealing with forensic samples, the difference of  
521 six to nine samples run in 90 minutes versus one sample in 90 minutes can make a large difference in  
522 time efficiency and dramatically reduce the instrumentation costs per sample. Instrument downtime  
523 due to maintenance and complications is also typically lower for QQQ systems.

524 Meeting the requirements of the forensic science community is an important challenge in this  
525 research. The Daubert standard requires forensic evidence to meet five major milestones including  
526 testing in real-world scenarios, publication and peer review, known error rates, standards to control the  
527 technique's operation, and general acceptance within the forensic science community [60]. SWGDAM  
528 developmental validation guidelines for genetic studies are similar, with objectives including  
529 characterization of genetic markers, species specificity, sensitivity studies, stability studies, precision and  
530 accuracy, case-type samples, and population studies [61]. SWGTOX gives even further guidelines on  
531 mass spectrometry standards including assessments on bias and precision, calibration models,  
532 instrument carry-over, inference studies, ionization suppression and enhancement, limit of detection,  
533 and limit of quantitation [24]. The proposed methods in this research meet both practical and legal  
534 standards. In terms of meeting the Daubert standard, GVP analysis has also undergone testing and  
535 validation studies using real-world scenarios, such as pigmentation status, body site origin and time in  
536 storage, peer review, and reported error [3, 17, 27, 62, 63]. This research contributes further by  
537 establishing the use of peptide standards as an additional validation option to investigators [3, 17, 19,  
538 27, 38, 64, 65]. To meet the SWGDAM developmental guidelines, GVP DNA markers have been  
539 characterized, species specificity is checked, sensitivity is currently being studied, stability of peptides  
540 has been demonstrated, precision and accuracy are reported in proteomic datasets, and population

## Alternative Platforms for Proteomic Genotyping

541 studies are currently being conducted [3, 19, 27, 38, 65]. Of the targeted mass spectrometry approaches  
542 taken, the QQQ mass selection windows for primary and transition ions are broader and less selective  
543 than those used in parallel reaction monitoring. However, any broadening of specificity is more than  
544 compensated for by the consistency of retention time, particularly in the presence of stable isotope  
545 labelled (SIL) peptides. To meet SWGTOX guidelines calibration verifications, proteomic calibration  
546 models, instrument carry-over criteria are being assessed and in development, or are in place. Likewise,  
547 the use of exogenous SIL peptides for inference of endogenous GVPs using transition ion and signal to  
548 noise ratios can be reported and available for replication (Figures S1 and S5). Additional levels of  
549 validation such as establishing limits of detection and quantification are currently under investigation.

550

### 551 *3.5 Extrapolation of Random Match Probability*

552 Random match probabilities for the 24 peptide panel do not exceed 1 in 1000, which is to be  
553 expected of a small panel. However, random match probabilities have been reported to reach up to 1 in  
554 624 million from 77 detected GVPs from a single hair shaft [17]. To model what RMP estimates could be  
555 if more sensitive targeted methods were applied, inferred genotypes were modeled as a function of  
556 increasing detection of GVPs. The modeled genotype frequencies of each allele were randomly selected  
557 from existing GVP genotype frequencies in the European reference population of the 1000 Genomes  
558 Project Consortium for 10 to 300 possible GVP detections [43]. One hundred iterations were completed  
559 and minimum, median, and maximum 1/RMP estimates were plotted for increasing GVP levels (Figure  
560 4). Previous data from single hair and 4mg hair digests were overlaid to validate a portion of the model  
561 [17]. The model demonstrates wide variation in potential 1/RMP values and different numbers of  
562 observed GVPs that reflect the stochastic nature of inferred genotypes from randomized alleles; not  
563 every genotype contains an allele, and genotype frequencies can vary widely. Not all of the actual  
564 overlaid 1/RMP values were within the minimum and maximum boundaries for estimated RMP, which



## Alternative Platforms for Proteomic Genotyping

565 reflects a higher number of GVPs occurring within an open reading frame, and therefore were treated as  
566 a single locus when processing actual GVP profiles [3]. The contingency of multiple GVPs in an open  
567 reading frame were not incorporated into the model. Likewise, heterozygosity was also not  
568 incorporated into the model, although the resulting product of genotype frequencies of two alleles ( $gf_{AB}$   
569 =  $gf_A \times gf_B$ ) closely approximates and is slightly more conservative than the actual genotype frequency  
570 ( $gf_{AB} = 2AB$ ) (Figure S6). The maximum difference between the two equations was only 6.25% at an  
571 allelic frequency of 0.5 (Figure S6). Expected 1/RMP values from a projected 1.6-fold increase in  
572 detection sensitivity was indicated on the model as was observed in MRM. For an estimated 130 GVP  
573 detections, projected values would range from an estimated maximum of 1 in  $10^{18}$  (1 in 1 quintillion), to  
574 a minimum of 1 in  $10^{10}$  (1 in 10 billion), with a median of 1 in  $10^{13}$  (1 in 10 trillion). For a 1.3-fold increase  
575 in sensitivity, as observed using the QuanDirect variant of PRM, the roughly 100 GVP detections. This  
576 was a significant improvement to current standards in proteomic genotyping and predicts that  
577 individualization can routinely be obtained using a single human hair shaft. Based on 20 repeated  
578 iterations there was an increase in median RMP of an order of magnitude per  $8.8 \pm 0.9$  GVP detections.

579 Many assumptions were made in this model, which elicit broad estimates of RMP. The model  
580 used does not perfectly reflect the method actually used to determine RMP from detected GVPs. GVPs  
581 from the hair shaft are often clustered in the same gene product and effects of linkage disequilibrium,  
582 accommodated in actual RMP estimates, were not taken into consideration. These differences may help  
583 to explain deviations between modelled RMPs and actual values. Actual values of RMP shown in the  
584 MCMC model are from previously published data that incorporate linkage disequilibrium into the RMP  
585 calculation [17]. The panel of 24 synthetic stable isotope labeled (SIL) GVPs used in this study were  
586 selected to represent a range of relative abundances from very frequently to rarely observed. This was  
587 to ensure that changes in detection sensitivity would be reflected in the data. They are not a random  
588 selection from the more than 400 validated GVPs identified to date and the observed 1.6-fold increase

## Alternative Platforms for Proteomic Genotyping

589 in sensitivity therefore is contingent. The increase in detection sensitivity was associated with an  
590 increase in false discovery rate, a scenario that is common in analytical chemistry. Since the panel of 24  
591 GVPs chosen does not accurately represent the full set of 408 GVPs, a bias towards more discriminating  
592 RMPs may exist. Mitigation of this effect was attempted by choosing GVPs that vary in detection  
593 sensitivity, length, and detection. Heterozygosity also was not incorporated into the model, and since  
594 this results in a slightly more conservative RMP estimates, this may account for some of the actual  
595 1/RMP values being more discriminating than the model.

596

## 597 **4. Conclusion**

598 This work demonstrates the utility for alternative analytical platforms in proteomic genotyping  
599 and establishes validation methods for the evaluation of inferred genotypes. Sample limitation, a lack of  
600 opportunity for reproducibility, and more stringent criteria for peptide identification are all relevant  
601 when interpreting data and communicating findings in a legal context. Maximizing relevant peptide  
602 signals is critical. Previous proteomic optimization has occurred at the level of sample processing to  
603 increase the release of detectable peptides from the hair matrix [17]. This study further optimized the  
604 detection of genetically variant peptides by focusing on the analytical framework. A range of three basic  
605 mass spectrometry approaches were utilized and associated to a reanalysis of GVP detection using  
606 standard shotgun proteomics [17]. These approaches included data dependent acquisition (DDA),  
607 systematic data independent acquisition (DIA), parallel reaction monitoring (PRM), and multiple reaction  
608 monitoring (MRM). PRM and MRM methods of acquisition also included the addition of a panel of 24  
609 stable isotope-labeled peptides to facilitate and validate GVP detection. While each method was  
610 conducted on mass spectrometry platforms with suitable configurations for each method, additional  
611 optimizations could still be conducted for each approach, particularly DIA. Nevertheless, the MRM  
612 method performed best in terms of GVP detection, with an overall increase in detection sensitivity of

## Alternative Platforms for Proteomic Genotyping

613 1.6x when compared to the traditional data dependent acquisition approach on a QE+ platform. This  
614 platform incorporated more robust analytical column chromatography and triple quadrupole mass  
615 spectrometry. In addition to increased sensitivity and a simplified analytical process, the ease of  
616 explanation in a legal setting, and use of preestablished methods and accreditation standards currently  
617 used in forensic toxicology should facilitate incorporation into the forensic community. In this study,  
618 targeted methods applied to GVP detection enhanced the use of hair protein as a source of human  
619 individualization, with a projected random match probability of 1 in 10 trillion if this method were  
620 applied to all 408 currently identified GVPs. Detection of human- or fluid-identifying peptides currently  
621 relies on MRM on triple quadrupole mass spectrometry platforms. An expansion of this targeted  
622 approach to include GVPs has the potential to dramatically improve the accessibility of proteomic  
623 genotyping, reducing costs and simplifying interpretation. Increased detection sensitivity will increase  
624 the discrimination and therefore utility of resulting random match probabilities. The use of targeted  
625 mass spectrometry may well place proteomic genotyping as a more accessible, quantitative, and legally  
626 explainable tool.

627

## 628 **Funding**

629 This study was supported by the National Institute of Justice, Office of Justice Programs, U.S.  
630 Department of Justice (Awards 2015-DN-BX-K065 and 2019-R2-CX-0051). The findings, statements, and  
631 opinions expressed in this manuscript are those of the authors and do not necessarily represent the  
632 opinions of the U.S. Department of Justice.

633

## 634 **Ethical Approval**

635 All procedures performed in studies involving human participants were in accordance with the ethical  
636 standards of the institutional and/or national research committee and with the 1964 Helsinki

## Alternative Platforms for Proteomic Genotyping

637 declaration and its later amendments or comparable ethical standards. All samples were collected  
638 following the guidelines provided by the Institutional Review Board (IRB# 832726) and Institutional  
639 Biosafety Committee (IBC) of the University of California, Davis, CA.

640

### 641 **Conflict of Interest**

642 The authors have declared no conflict of interest, with the exception of GJP who has a patent based on  
643 the use of genetically variant peptides for human identification (US 8,877,455 B2, Australian Patent  
644 2011229918, Canadian Patent CA 2794248, and European Patent EP11759843.3). The patent is owned  
645 by Parker Proteomics LLC. Protein-Based Identification Technologies LLC (PBIT) has an exclusive license  
646 to develop the intellectual property and is co-owned by Utah Valley University and GJP. This ownership  
647 of PBIT and associated intellectual property does not alter policies on sharing data and materials. These  
648 financial conflicts of interest are administered by the Research Integrity and Compliance Office, Office of  
649 Research at the University of California, Davis to ensure compliance with University of California Policy.

650

### 651 **Acknowledgments**

652 The authors thank Dr. Bob Rice, Dr. Blythe Durbin-Johnson, Dr. Ben Moeller, and Dr. John Newman for  
653 their advice. This publication was made possible, in part, with support from the UC Davis Genome  
654 Center Bioinformatics Core Facility. The sequencing was carried out at the DNA Technologies and  
655 Expression Analysis Cores at the UC Davis Genome Center, LC-MS/MS was supported by NIH Shared  
656 Instrumentation Grant 1S10OD010786-01. We specifically acknowledge the assistance of Jie Li, Emily  
657 Kumimoto, Siranoosh Ashtari, Vanessa K Rashbrook, and Lutz Froenicke.

658

659

660

661

662

## Alternative Platforms for Proteomic Genotyping

### 663 **References**

664

665 [1] K. M. Legg, R. Powell, N. Reisdorph, R. Reisdorph, and P. B. Danielson, "Discovery of  
666 highly specific protein markers for the identification of biological stains," *Electrophoresis*,  
667 vol. 35, no. 21–22, pp. 3069–3078, 2014, doi: 10.1002/elps.201400125.

668 [2] A. Tailor, J. C. Waddington, X. Meng, and B. K. Park, "Mass Spectrometric and Functional  
669 Aspects of Drug-Protein Conjugation," *Chem. Res. Toxicol.*, vol. 29, no. 12, pp. 1912–  
670 1935, 2016, doi: 10.1021/acs.chemrestox.6b00147.

671 [3] G. J. Parker *et al.*, "Demonstration of protein-based human identification using the hair  
672 shaft proteome," *PLoS One*, vol. 11, no. 9, pp. 1–26, 2016, doi:  
673 10.1371/journal.pone.0160653.

674 [4] H. Yang, B. Zhou, M. Prinz, and D. Siegel, "Proteomic analysis of menstrual blood," *Mol.*  
675 *Cell. Proteomics*, vol. 11, no. 10, pp. 1024–1035, 2012, doi: 10.1074/mcp.M112.018390.

676 [5] K. M. Legg, L. M. Labay, S. S. Aiken, and B. K. Logan, "Validation of a Fully Automated  
677 Immunoaffinity Workflow for the Detection and Quantification of Insulin Analogs by LC-  
678 MS-MS in Postmortem Vitreous Humor," *J. Anal. Toxicol.*, vol. 43, no. 7, pp. 505–511,  
679 2019, doi: 10.1093/jat/bkz014.

680 [6] T. Buonasera *et al.*, "A comparison of proteomic, genomic, and osteological methods of  
681 archaeological sex estimation," *Sci. Rep.*, vol. 10, no. 1, pp. 1–15, 2020, doi:  
682 10.1038/s41598-020-68550-w.

683 [7] L. Eckhart, S. Lippens, E. Tschachler, and W. Declercq, "Cell death by cornification,"  
684 *Biochim. Biophys. Acta - Mol. Cell Res.*, vol. 1833, no. 12, pp. 3471–3480, 2013, doi:  
685 10.1016/j.bbamcr.2013.06.010.

686 [8] M. E. Allentoft *et al.*, "The half-life of DNA in bone: Measuring decay kinetics in 158 dated  
687 fossils," *Proc. R. Soc. B Biol. Sci.*, vol. 279, no. 1748, pp. 4724–4733, 2012, doi:  
688 10.1098/rspb.2012.1745.

689 [9] M. M. Holland *et al.*, "Mitochondrial DNA Sequence Analysis of Human Skeletal Remains:  
690 Identification of Remains from the Vietnam War," *J. Forensic Sci.*, vol. 38, no. 3, p.  
691 13439J, 1993, doi: 10.1520/jfs13439j.

692 [10] C. Ginther, L. Issel-Tarver, and M. C. King, "Identifying individuals by sequencing  
693 mitochondrial DNA from teeth," *Nat. Genet.*, vol. 2, no. 2, pp. 135–138, 1992, doi:  
694 10.1038/ng1092-135.

695 [11] D. Fenyő and R. C. Beavis, "A method for assessing the statistical significance of mass  
696 spectrometry-based protein identifications using general scoring schemes," *Anal. Chem.*,  
697 vol. 75, no. 4, pp. 768–774, 2003, doi: 10.1021/ac0258709.

698 [12] D. Fenyő, J. Eriksson, and R. Beavis, "Mass Spectrometric Protein Identification Using the  
699 Global Proteome Machine," in *Methods in Molecular Biology*, no. 10, 2010, pp. 189–202.

## Alternative Platforms for Proteomic Genotyping

- 700 [13] F. Meier *et al.*, “Online parallel accumulation–serial fragmentation (PASEF) with a novel  
701 trapped ion mobility mass spectrometer,” *Mol. Cell. Proteomics*, vol. 17, no. 12, pp.  
702 2534–2545, 2018, doi: 10.1074/mcp.TIR118.000900.
- 703 [14] M. Pla-Roca *et al.*, “Antibody colocalization microarray: A scalable technology for  
704 multiplex protein analysis in complex samples,” *Mol. Cell. Proteomics*, vol. 11, no. 4, pp.  
705 1–12, 2012, doi: 10.1074/mcp.M111.011460.
- 706 [15] N. Nagaraj *et al.*, “Deep proteome and transcriptome mapping of a human cancer cell  
707 line,” *Mol. Syst. Biol.*, vol. 7, no. 548, pp. 1–8, 2011, doi: 10.1038/msb.2011.81.
- 708 [16] T. Geiger, A. Wehner, C. Schaab, J. Cox, and M. Mann, “Comparative proteomic analysis  
709 of eleven common cell lines reveals ubiquitous but varying expression of most proteins,”  
710 *Mol. Cell. Proteomics*, vol. 11, no. 3, pp. 1–11, 2012, doi: 10.1074/mcp.M111.014050.
- 711 [17] Z. C. Goecker, M. R. Salemi, N. Karim, B. S. Phinney, R. H. Rice, and G. J. Parker, “Optimal  
712 processing for proteomic genotyping of single human hairs,” *Forensic Sci. Int. Genet.*, vol.  
713 47, no. December 2019, p. 102314, 2020, doi: 10.1016/j.fsigen.2020.102314.
- 714 [18] K. E. Mason, P. H. Paul, F. Chu, D. S. Anex, and B. R. Hart, “Development of a Protein-  
715 based Human Identification Capability from a Single Hair,” *J. Forensic Sci.*, vol. 64, no. 4,  
716 pp. 1152–1159, 2019, doi: 10.1111/1556-4029.13995.
- 717 [19] Z. Zhang *et al.*, “Sensitive Method for the Confident Identification of Genetically Variant  
718 Peptides in Human Hair Keratin,” *J. Forensic Sci.*, vol. 65, no. 2, pp. 406–420, 2020, doi:  
719 10.1111/1556-4029.14229.
- 720 [20] M. J. MacCoss, C. C. Wu, and J. R. Yates, “Probability based validation of protein  
721 identifications using a modified SEQUEST algorithm,” *Anal. Chem.*, vol. 74, no. 21, pp.  
722 5593–5599, 2002, doi: 10.1021/ac025826t.
- 723 [21] J. Zhang *et al.*, “PEAKS DB: De novo sequencing assisted database search for sensitive and  
724 accurate peptide identification,” *Mol. Cell. Proteomics*, vol. 11, no. 4, pp. 1–8, 2012, doi:  
725 10.1074/mcp.M111.010587.
- 726 [22] J. S. Cottrell, “Protein identification using MS/MS data,” *J. Proteomics*, vol. 74, no. 10, pp.  
727 1842–1851, 2011, doi: 10.1016/j.jprot.2011.05.014.
- 728 [23] H. Zhu, S. Pan, S. Gu, E. Morton Bradbury, and X. Chen, “Amino acid residue specific  
729 stable isotope labeling for quantitative proteomics,” *Rapid Commun. Mass Spectrom.*,  
730 vol. 16, no. 22, pp. 2115–2123, 2002, doi: 10.1002/rcm.831.
- 731 [24] Scientific Working Group for Forensic Toxicology (SWGTOX), “Scientific working group for  
732 forensic toxicology (SWGTOX) standard practices for method validation in forensic  
733 toxicology,” *J. Anal. Toxicol.*, vol. 37, no. 7, pp. 452–474, 2013, doi: 10.1093/jat/bkt054.
- 734 [25] European Parliament and the Council of the European Union, “96/23/EC COMMISSION  
735 DECISION of 12 August 2002 implementing Council Directive 96/23/EC concerning the  
736 performance of analytical methods and the interpretation of results (notified under

## Alternative Platforms for Proteomic Genotyping

- 737 document number C(2002) 3044)(Text with EEA relevance) (2002/657/EC),” *Off. J. Eur.*  
738 *communities*, no. L 221/8, pp. 8–36, 2002, doi: 10.1017/CBO9781107415324.004.
- 739 [26] World Anti-Doping Agency (WADA), “Identification criteria for qualitative assays  
740 incorporating column chromatography and mass spectrometry,” *WADA Tech. Doc. -*  
741 *TD2010IDCR*, pp. 1–9, 2010, doi: TD2010IDCR.
- 742 [27] J. A. Milan *et al.*, “Comparison of protein expression levels and proteomically-inferred  
743 genotypes using human hair from different body sites,” *Forensic Sci. Int. Genet.*, vol. 41,  
744 no. March, pp. 19–23, 2019, doi: 10.1016/j.fsigen.2019.03.009.
- 745 [28] R. N. Franklin, N. Karim, Z. C. Goecker, B. P. Durbin-Johnson, R. H. Rice, and G. J. Parker,  
746 “Proteomic genotyping: Using mass spectrometry to infer SNP genotypes in pigmented  
747 and non-pigmented hair,” *Forensic Sci. Int.*, vol. 310, 2020, doi:  
748 10.1016/j.forsciint.2020.110200.
- 749 [29] S. Gallien, E. Duriez, C. Crone, M. Kellmann, T. Moehring, and B. Domon, “Targeted  
750 proteomic quantification on quadrupole-orbitrap mass spectrometer,” *Mol. Cell.*  
751 *Proteomics*, vol. 11, no. 12, pp. 1709–1723, 2012, doi: 10.1074/mcp.O112.019802.
- 752 [30] L. C. Gillet *et al.*, “Targeted data extraction of the MS/MS spectra generated by data-  
753 independent acquisition: A new concept for consistent and accurate proteome analysis,”  
754 *Mol. Cell. Proteomics*, vol. 11, no. 6, pp. 1–17, 2012, doi: 10.1074/mcp.O111.016717.
- 755 [31] C. Ludwig, L. Gillet, G. Rosenberger, S. Amon, B. C. Collins, and R. Aebersold, “Data-  
756 independent acquisition-based SWATH - MS for quantitative proteomics: a tutorial,”  
757 *Mol. Syst. Biol.*, vol. 14, no. 8, pp. 1–23, 2018, doi: 10.15252/msb.20178126.
- 758 [32] G. McAlister, S. Eliuk, and R. Huguet, *QuanDirect: A simplified approach to fast and*  
759 *accurate, high throughput targeted MS2 quantitation using internal standards. . .*
- 760 [33] D. Remane, D. K. Wissenbach, and F. T. Peters, “Recent advances of liquid  
761 chromatography–(tandem) mass spectrometry in clinical and forensic toxicology — An  
762 update,” *Clin. Biochem.*, vol. 49, no. 13–14, pp. 1051–1071, 2016, doi:  
763 10.1016/j.clinbiochem.2016.07.010.
- 764 [34] M. M. Mbughuni, P. J. Jannetto, and L. J. Langman, “Mass spectrometry applications for  
765 toxicology,” *J. Int. Fed. Clin. Chem. Lab. Med.*, vol. 27, no. 4, pp. 2016–2043, 2016.
- 766 [35] J. Maublanc, S. Dulaurent, J. Morichon, G. Lachâtre, and J. Michel Gaulier, “Identification  
767 and quantification of 35 psychotropic drugs and metabolites in hair by LC-MS/MS:  
768 application in forensic toxicology,” *Int. J. Legal Med.*, vol. 129, no. 2, pp. 259–268, 2015,  
769 doi: 10.1007/s00414-014-1005-1.
- 770 [36] I. Shah, A. Petroczi, M. Uvacsek, M. Ránky, and D. P. Naughton, “Hair-based rapid  
771 analyses for multiple drugs in forensics and doping: Application of dynamic multiple  
772 reaction monitoring with LC-MS/MS,” *Chem. Cent. J.*, vol. 8, no. 1, pp. 1–10, 2014, doi:  
773 10.1186/s13065-014-0073-0.

## Alternative Platforms for Proteomic Genotyping

- 774 [37] U. Garg and Y. V Zhang, "Mass Spectrometry in Clinical Laboratory: Applications in  
775 Therapeutic Drug Monitoring and Toxicology," *Clin. Appl. Mass Spectrom. Drug Anal.*, vol.  
776 1383, pp. 241–246, 2016, doi: 10.1007/978-1-4939-3252-8.
- 777 [38] K. F. Jones, T. L. Carlson, B. A. Eckenrode, and J. Donfack, "Assessing protein sequencing  
778 in human single hair shafts of decreasing lengths," *Forensic Sci. Int. Genet.*, vol. 44, no.  
779 September 2019, p. 102145, 2020, doi: 10.1016/j.fsigen.2019.102145.
- 780 [39] R. Huguet, S. Eliuk, M. Blank, V. Zabrouskov, and G. McAlister, "A simplified approach to  
781 fast and accurate, high throughput targeted MS2 quantitation using internal standard,"  
782 2016.
- 783 [40] B. MacLean *et al.*, "Skyline: An open source document editor for creating and analyzing  
784 targeted proteomics experiments," *Bioinformatics*, vol. 26, no. 7, pp. 966–968, 2010, doi:  
785 10.1093/bioinformatics/btq054.
- 786 [41] S. Gessulat *et al.*, "Prosit: proteome-wide prediction of peptide tandem mass spectra by  
787 deep learning," *Nat. Methods*, vol. 16, no. 6, pp. 509–518, 2019, doi: 10.1038/s41592-  
788 019-0426-7.
- 789 [42] I. W. Evett and B. Weir, *Interpreting DNA evidence: statistical genetics for forensic  
790 scientists*. Sunderland MA: Sinauer Associates Sunderland MA, 1998.
- 791 [43] A. Auton *et al.*, "A global reference for human genetic variation," *Nature*, vol. 526, no.  
792 7571, pp. 68–74, 2015, doi: 10.1038/nature15393.
- 793 [44] N. Metropolis, A. W. Rosenbluth, M. N. Rosenbluth, A. H. Teller, and E. Teller, "Equation  
794 of State Calculations by Fast Computing Machines," *J. Chem. Phys.*, vol. 21, no. 6, pp.  
795 1087–1092, 1953.
- 796 [45] W. K. Hastings, "Monte carlo sampling methods using Markov chains and their  
797 applications," *Biometrika*, vol. 57, no. 1, pp. 97–109, 1970, doi: 10.1093/biomet/57.1.97.
- 798 [46] Y. Perez-Riverol *et al.*, "PRIDE inspector toolsuite: Moving toward a universal  
799 visualization tool for proteomics data standard formats and quality assessment of  
800 proteomexchange datasets," *Mol. Cell. Proteomics*, vol. 15, no. 1, pp. 305–317, 2016, doi:  
801 10.1074/mcp.O115.050229.
- 802 [47] V. Sharma *et al.*, "Panorama: A targeted proteomics knowledge base," *J. Proteome Res.*,  
803 vol. 13, no. 9, pp. 4205–4210, 2014, doi: 10.1021/pr5006636.
- 804 [48] Y. J. Lee, R. H. Rice, and Y. M. Lee, "Proteome analysis of human hair shaft: From protein  
805 identification to posttranslational modification," *Mol. Cell. Proteomics*, vol. 5, no. 5, pp.  
806 789–800, 2006, doi: 10.1074/mcp.M500278-MCP200.
- 807 [49] L. D. Fricker, "Limitations of Mass Spectrometry-Based Peptidomic Approaches," *J. Am.  
808 Soc. Mass Spectrom.*, vol. 26, no. 12, pp. 1981–1991, 2015, doi: 10.1007/s13361-015-  
809 1231-x.
- 810 [50] S. R. Wilson, T. Vehus, H. S. Berg, and E. Lundanes, "Nano-LC in proteomics: Recent



## Alternative Platforms for Proteomic Genotyping

- 811 advances and approaches," *Bioanalysis*, vol. 7, no. 14, pp. 1799–1815, 2015, doi:  
812 10.4155/bio.15.92.
- 813 [51] H. Henry, H. R. Sobhi, O. Scheibner, M. Bromirski, S. B. Nimkar, and B. Rochat,  
814 "Comparison between a high-resolution single-stage Orbitrap and a triple quadrupole  
815 mass spectrometer for quantitative analyses of drugs," *Rapid Commun. Mass Spectrom.*,  
816 vol. 26, no. 5, pp. 499–509, 2012, doi: 10.1002/rcm.6121.
- 817 [52] E. V Moskovets and A. R. Ivanov, "Comparative studies of peak intensities and  
818 chromatographic separation of proteolytic digests, PTMs, and intact proteins obtained  
819 by nanoLC-ESI MS analysis at room and elevated temperatures," *Anal. Bioanal. Chem.*,  
820 pp. 3953–3968, 2016, doi: 10.1007/s00216-016-9386-2.
- 821 [53] J. C. Gesquiere, E. Diosis, M. T. Cung, and A. Tartar, "Slow isomerization of some proline-  
822 containing peptides inducing peak splitting during reversed-phase high-performance  
823 liquid chromatography," *J. Chromatogr. A*, vol. 478, no. C, pp. 121–129, 1989, doi:  
824 10.1016/0021-9673(89)90010-1.
- 825 [54] F. Zhang, W. Ge, G. Ruan, X. Cai, and T. Guo, "Data-Independent Acquisition Mass  
826 Spectrometry-Based Proteomics and Software Tools: A Glimpse in 2020," *Proteomics*,  
827 vol. 1900276, pp. 1–12, 2020, doi: 10.1002/pmic.201900276.
- 828 [55] A. Wolf-Yadlin, A. Hu, and W. S. Noble, "Technical advances in proteomics: New  
829 developments in data-independent acquisition," *F1000Research*, vol. 5, no. 0, pp. 1–12,  
830 2016, doi: 10.12688/f1000research.7042.1.
- 831 [56] L. K. Pino, S. C. Just, M. J. MacCoss, and B. C. Searle, "Acquiring and Analyzing Data  
832 Independent Acquisition Proteomics Experiments without Spectrum Libraries," *Mol. Cell.*  
833 *Proteomics*, vol. 19, no. 7, pp. 1088–1103, 2020, doi: 10.1074/mcp.P119.001913.
- 834 [57] L. Stopfer *et al.*, "High-density, targeted monitoring of tyrosine phosphorylation reveals  
835 activated signaling networks in human tumors," *bioRxiv*, 2020, doi:  
836 10.1101/2020.06.01.127787.
- 837 [58] L. M. Smith and N. L. Kelleher, "Proteoform: A single term describing protein  
838 complexity," *Nat. Methods*, vol. 10, no. 3, pp. 186–187, 2013, doi: 10.1038/nmeth.2369.
- 839 [59] G. Rosenberger *et al.*, "Inference and quantification of peptidofoms in large sample  
840 cohorts by SWATH-MS," *Nat. Biotechnol.*, vol. 35, no. 8, pp. 781–788, 2017, doi:  
841 10.1038/nbt.3908.
- 842 [60] M. G. Farrell, "Daubert v Merrell Dow Pharmaceutircals, Inc: Epistemology and Legal  
843 Process," *Cardozo Law Rev.*, vol. 15, pp. 2183–2217, 2014.
- 844 [61] Scientific Working Group on DNA Analysis Methods (SWGDM), "Validation Guidelines  
845 for DNA Analysis Methods," no. December 2016. pp. 1–13, 2016, [Online]. Available:  
846 [www.swgdam.org](http://www.swgdam.org).
- 847 [62] T. Borja *et al.*, "Proteomic genotyping of fingerprint donors with genetically variant

## Alternative Platforms for Proteomic Genotyping

- 848 peptides," *Forensic Sci. Int. Genet.*, vol. 42, no. March, pp. 21–30, 2019, doi:  
849 10.1016/j.fsigen.2019.05.005.
- 850 [63] G. Parker *et al.*, "Proteomic genotyping: Using mass spectrometry to infer SNP genotypes  
851 in a forensic context," *Forensic Sci. Int. Genet. Suppl. Ser.*, vol. 7, no. 1, pp. 664–666,  
852 2019, doi: 10.1016/j.fsigss.2019.10.130.
- 853 [64] Z. C. Goecker, "Forensic proteomics: extracting identifying information from problematic  
854 evidence types," 2019.
- 855 [65] L. A. Catlin *et al.*, "Demonstration of a mitochondrial DNA-compatible workflow for  
856 genetically variant peptide identification from human hair samples," *Forensic Sci. Int.*  
857 *Genet.*, vol. 43, no. June, 2019, doi: 10.1016/j.fsigen.2019.102148.
- 858  
859  
860  
861  
862  
863  
864  
865  
866  
867  
868  
869  
870  
871  
872  
873  
874  
875  
876  
877  
878  
879  
880  
881  
882  
883  
884  
885  
886  
887  
888  
889  
890  
891

Alternative Platforms for Proteomic Genotyping

892 **Figures**

893

| Peptide Information             |              | SNP information |              |       |
|---------------------------------|--------------|-----------------|--------------|-------|
| Standard Peptide Sequence       | MW (average) | Gene            | RSID         | SAP   |
| DSQECIL <b>T</b> ETEAR          | 1561.56      | KRT39           | rs17843021_G | T341M |
| DSQECIL <b>M</b> ETEAR          | 1591.65      | KRT39           | rs17843021_A | T341M |
| GIL <b>I</b> DTSR               | 883.92       | HEXB            | rs10805890_A | I207V |
| GIL <b>V</b> DTSR               | 869.90       | HEXB            | rs10805890_G | I207V |
| ALET <b>V</b> QER               | 954.96       | GSDMA           | rs7212938_G  | V128L |
| ALET <b>L</b> QER               | 968.98       | GSDMA           | rs7212938_T  | V128L |
| LEGEIN <b>T</b> YR              | 1104.10      | KRT32           | rs2071563_G  | T395M |
| LEGEIN <b>M</b> YR              | 1134.20      | KRT32           | rs2071563_A  | T395M |
| YISLIYTNYEAGKDDYVK              | 2163.30      | GSTP1           | rs1695_A     | I105V |
| Y <b>V</b> SLIYTNYEAGKDDYVK     | 2149.27      | GSTP1           | rs1695_G     | I105V |
| VSAMYSSSS <b>C</b> KLPSLSPVAR   | 2137.37      | KRT35           | rs743686_A   | S36P  |
| VSAMYSSSS <b>P</b> KLPSLSPVAR   | 2147.41      | KRT35           | rs743686_G   | S36P  |
| EHCSACGPL <b>S</b> R            | 1283.33      | KRT39           | rs7213256_C  | R456Q |
| EHCSACGPL <b>S</b> QLLVK        | 1706.90      | KRT39           | rs7213256_T  | R456Q |
| EWSTFAVGPGHCLQL <b>N</b> DR     | 2097.20      | NEU2            | rs2233391_A  | H168N |
| EWSTFAVGPGHCLQL <b>H</b> DR     | 2120.24      | NEU2            | rs2233391_C  | H168N |
| GVALSN <b>V</b> IHK             | 1045.16      | SERPINB5        | rs1455555_A  | I319V |
| GVALSN <b>V</b> VHK             | 1031.13      | SERPINB5        | rs1455555_G  | I319V |
| DLNMDC <b>M</b> VAEIK           | 1446.63      | KRT83           | rs2852464_C  | I279M |
| DLNMDC <b>I</b> VAEIK           | 1428.59      | KRT83           | rs2852464_G  | I279M |
| GAFLY <b>E</b> PCGVSTPVLSTGVLR  | 2233.48      | KRT82           | rs1732263_C  | E452D |
| GAFLY <b>D</b> PCGVSTPVLSTGVLR  | 2219.45      | KRT82           | rs1732263_G  | E452D |
| A* <b>R</b> PLEQAVAAIVCTFQEYAGR | 2402.62      | S100A3          | rs36022742_C | R3K   |
| A* <b>K</b> PLEQAVAAIVCTFQEYAGR | 2374.60      | S100A3          | rs36022742_T | R3K   |

894

895 Table 1. **Genetically variant peptide standards.** These peptides were obtained from JPT Peptide  
 896 Technologies and were pooled and spiked into 17 matrices from five subjects. These were spiked only  
 897 into fractions being analyzed via PRM and MRM. Red amino acids indicate the SAP location per GVP, and  
 898 \* indicates acetylation. All cysteines (C) are carbamidomethylated (+57), and all C-terminal amino acids  
 899 are isotopically labeled. R contains 6 x <sup>13</sup>C and 4 x <sup>15</sup>N (+10 Da) and K contains 6 x <sup>13</sup>C and 2 x <sup>15</sup>N (+8 Da).

900

## Alternative Platforms for Proteomic Genotyping

901

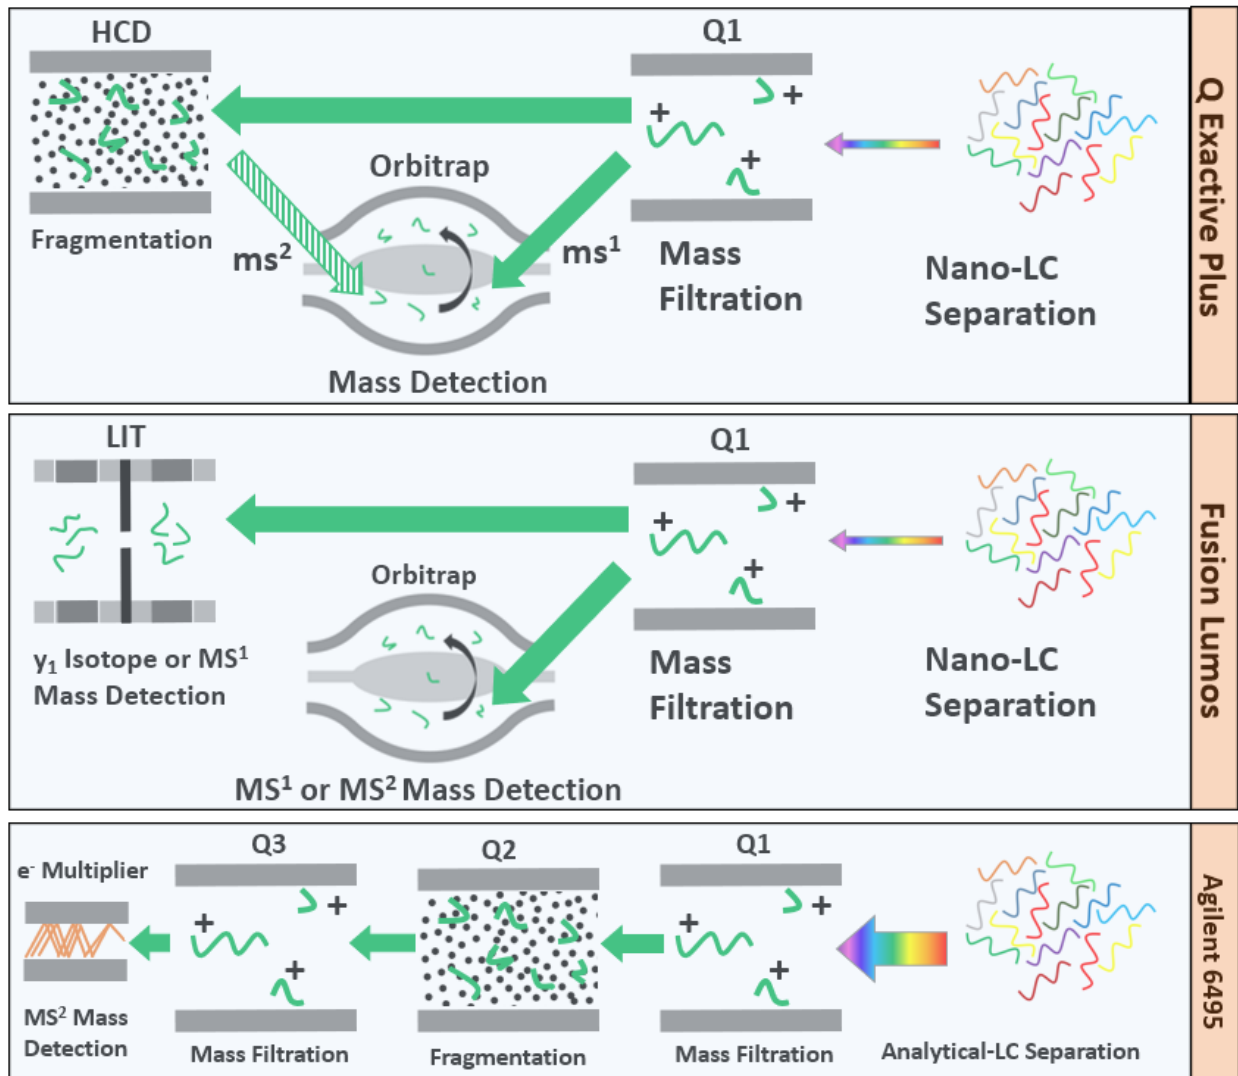

902

903 Figure 1. **A summary of mass spectrometry data acquisition methods.** 2 cm of scalp hair was digested.  
904 This peptide mixture was then analyzed using four different LC-MS/MS data acquisition methods; two  
905 methods of untargeted mass spectrometry (data-dependent acquisition on the Q Exactive plus, QE+,  
906 data independent acquisition on the Fusion Lumos, Lumos-DIA) and two methods of targeted mass  
907 spectrometry (parallel reaction monitoring on the Fusion Lumos, Lumos-QD, multiple reaction  
908 monitoring on a triple quadrupole Agilent 6495, QQQ). For the targeted methods, an isotope-labeled  
909 peptide mix was spiked into the hair digest. Both the isotope labeled peptide and endogenous peptide  
910 elute together and their  $MS^2$  spectra were compared to confirm the presence of the light isotope  
911 endogenous peptide.

912

913

914

## Alternative Platforms for Proteomic Genotyping

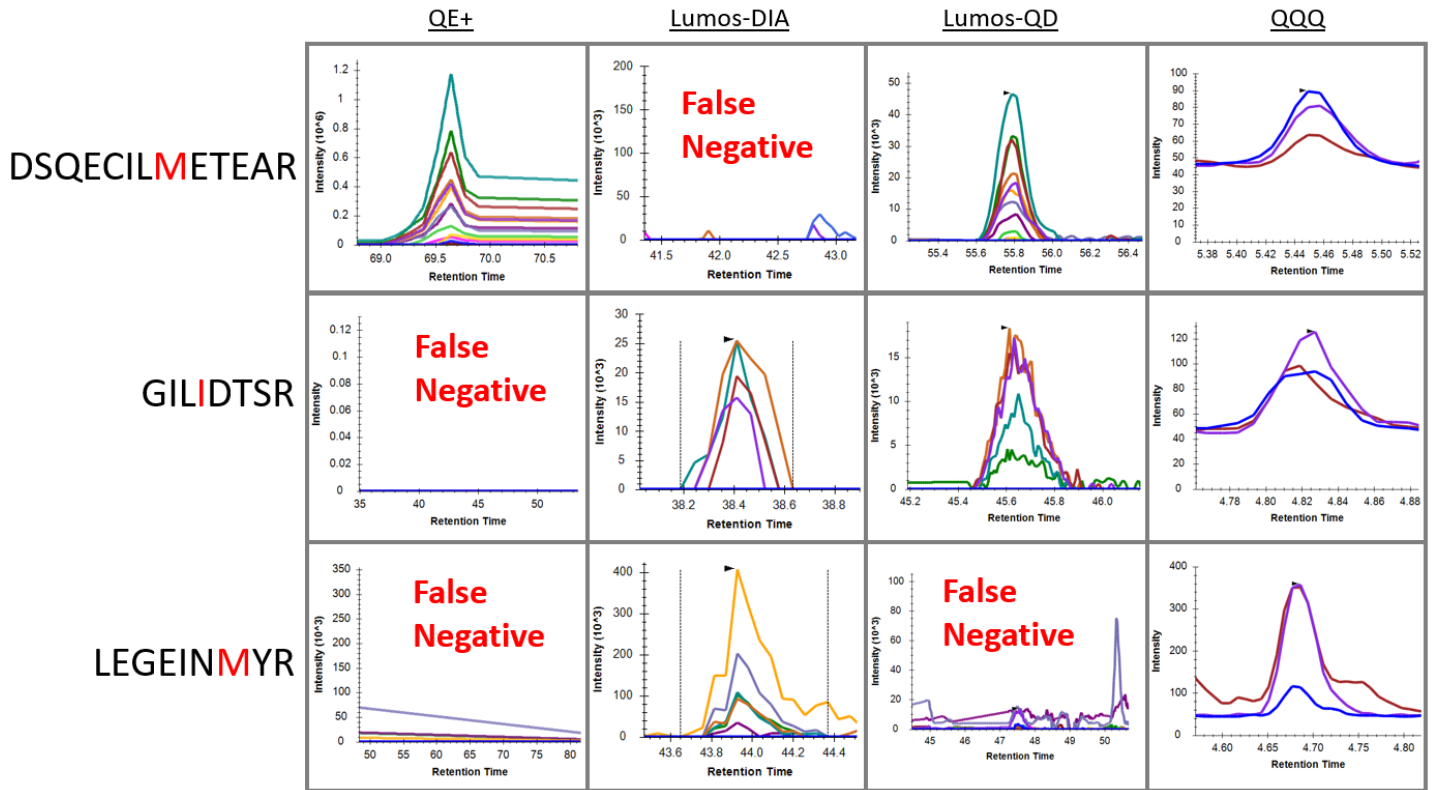

916 Figure 2. **Performance of four analytical platforms.** This figure demonstrates the usefulness of targeted  
917 proteomic methods for three of the 24 GVP peptides analyzed. All peptides are expected to be present  
918 in the sample as confirmed by genotyping. However, the first peptide (DSQECILMETEAR) is missing in the  
919 Lumos-DIA, the second peptide (GILIDTSR) is missing in the QE+, and the third peptide (LEGEINMYR) is  
920 missing in both QE+ and Lumos-QD.

921

## Alternative Platforms for Proteomic Genotyping

| Gene     | RSID         | SAP   | Sequence              | QE+ |     |    | Lumos-DIA |     |    | Lumos-QD |     |    | QQQ |     |    |
|----------|--------------|-------|-----------------------|-----|-----|----|-----------|-----|----|----------|-----|----|-----|-----|----|
|          |              |       |                       | EUR | AFR | B  | EUR       | AFR | B  | EUR      | AFR | B  | EUR | AFR | B  |
| KRT39    | rs17843021_G | T341M | DSQECILTETEAR         | TP  | TP  | TP | TP        | TP  | TP | TP       | TP  | TP | TP  | TP  | TP |
| KRT39    | rs17843021_A | T341M | DSQECILmETEAR         | TP  | TP  | TP | TP        | TP  | TP | TP       | TP  | TP | TP  | TP  | TP |
| HEXB     | rs10805890_A | I207V | GILIDTSR              | TP  | TP  | TP | TP        | TP  | TP | TP       | TP  | TP | TP  | TP  | TP |
| HEXB     | rs10805890_G | I207V | GILvDTSR              | TP  | TP  | TP | TP        | TP  | TP | TP       | TP  | TP | TP  | TP  | TP |
| GSDMA    | rs7212938_G  | V128L | ALETVQER              | TP  | TP  | TP | TP        | TP  | TP | TP       | TP  | TP | TP  | TP  | TP |
| GSDMA    | rs7212938_T  | V128L | ALETIQER              | TP  | TP  | TP | TP        | TP  | TP | TP       | TP  | TP | TP  | TP  | TP |
| KRT32    | rs2071563_G  | T395M | LEGEINTYR             | TP  | TP  | TP | TP        | TP  | TP | TP       | TP  | TP | TP  | TP  | TP |
| KRT32    | rs2071563_A  | T395M | LEGEINmYR             | TP  | TP  | TP | TP        | TP  | TP | TP       | TP  | TP | TP  | TP  | TP |
| GSTP1    | rs1695_A     | I105V | YISLIYTNYEAGKDDYVK    | TP  | TP  | TP | TP        | TP  | TP | TP       | TP  | TP | TP  | TP  | TP |
| GSTP1    | rs1695_G     | I105V | YvSLIYTNYEAGKDDYVK    | TP  | TP  | TP | TP        | TP  | TP | TP       | TP  | TP | TP  | TP  | TP |
| KRT35    | rs743686_A   | S36P  | VSAMYSSSCKLPSLSPVAR   | TP  | TP  | TP | TP        | TP  | TP | TP       | TP  | TP | TP  | TP  | TP |
| KRT35    | rs743686_G   | S36P  | VSAMYSSSpCKLPSLSPVAR  | TP  | TP  | TP | TP        | TP  | TP | TP       | TP  | TP | TP  | TP  | TP |
| KRT39    | rs7213256_C  | R456Q | EHCACGPLSR            | TP  | TP  | TP | TP        | TP  | TP | TP       | TP  | TP | TP  | TP  | TP |
| KRT39    | rs7213256_T  | R456Q | EHCACGPLSqLLVK        | TP  | TP  | TP | TP        | TP  | TP | TP       | TP  | TP | TP  | TP  | TP |
| NEU2     | rs2233391_A  | H168N | EWSTFAVGPGHCLQLnDR    | TP  | TP  | TP | TP        | TP  | TP | TP       | TP  | TP | TP  | TP  | TP |
| NEU2     | rs2233391_C  | H168N | EWSTFAVGPGHCLQLHnDR   | TP  | TP  | TP | TP        | TP  | TP | TP       | TP  | TP | TP  | TP  | TP |
| SERPINB5 | rs1455555_A  | I319V | GVALSNVHK             | TP  | TP  | TP | TP        | TP  | TP | TP       | TP  | TP | TP  | TP  | TP |
| SERPINB5 | rs1455555_G  | I319V | GVALSNVvHK            | TP  | TP  | TP | TP        | TP  | TP | TP       | TP  | TP | TP  | TP  | TP |
| KRT83    | rs2852464_C  | I279M | DLNMDCmVAEIK          | TP  | TP  | TP | TP        | TP  | TP | TP       | TP  | TP | TP  | TP  | TP |
| KRT83    | rs2852464_G  | I279M | DLNMDCIvAEIK          | TP  | TP  | TP | TP        | TP  | TP | TP       | TP  | TP | TP  | TP  | TP |
| KRT82    | rs1732263_C  | E452D | GAFLYEPCGVSTPVLSTGVLr | TP  | TP  | TP | TP        | TP  | TP | TP       | TP  | TP | TP  | TP  | TP |
| KRT82    | rs1732263_G  | E452D | GAFLYdPCGVSTPVLSTGVLr | TP  | TP  | TP | TP        | TP  | TP | TP       | TP  | TP | TP  | TP  | TP |
| S100A3   | rs36022742_C | R3K   | ARPLEQAVAAIVCTFQEYAGR | TP  | TP  | TP | TP        | TP  | TP | TP       | TP  | TP | TP  | TP  | TP |
| S100A3   | rs36022742_T | R3K   | AkPLEQAVAAIVCTFQEYAGR | TP  | TP  | TP | TP        | TP  | TP | TP       | TP  | TP | TP  | TP  | TP |

### QE+

|       |       |
|-------|-------|
| 26.4% | 34.7% |
| 0.7%  | 38.2% |

FDR = 2.6% Sensitivity = 43.2%

### Lumos-DIA

|       |       |
|-------|-------|
| 13.2% | 47.9% |
| 0.7%  | 38.2% |

FDR = 5.0% Sensitivity = 21.6%

### Lumos-QD

|       |       |
|-------|-------|
| 33.3% | 27.8% |
| 4.9%  | 34.0% |

FDR = 12.7% Sensitivity = 54.5%

### QQQ

|       |       |
|-------|-------|
| 42.4% | 18.8% |
| 2.1%  | 36.8% |

FDR = 4.7% Sensitivity = 69.3%

923 Figure 3. **GVP matrix evaluating four analytical methods.** This matrix represents GVPs that have been  
 924 verified via whole exome sequencing. Each row is a variant peptide and each column is an accumulated  
 925 GVP profile from three replicates. QE+, data dependent acquisition on Q Exactive+; Lumos-DIA, data  
 926 independent acquisition on the Fusion Lumos; Lumos-QD, QuanDirect on Fusion Lumos; QQQ, multiple  
 927 reaction monitoring on Agilent 6495; EUR, three European subjects; AFR, two African subjects; TP, true  
 928 positive; FN, false negative; FP, false positive; TN, true negative; FDR, false discovery rate.

929

## Alternative Platforms for Proteomic Genotyping

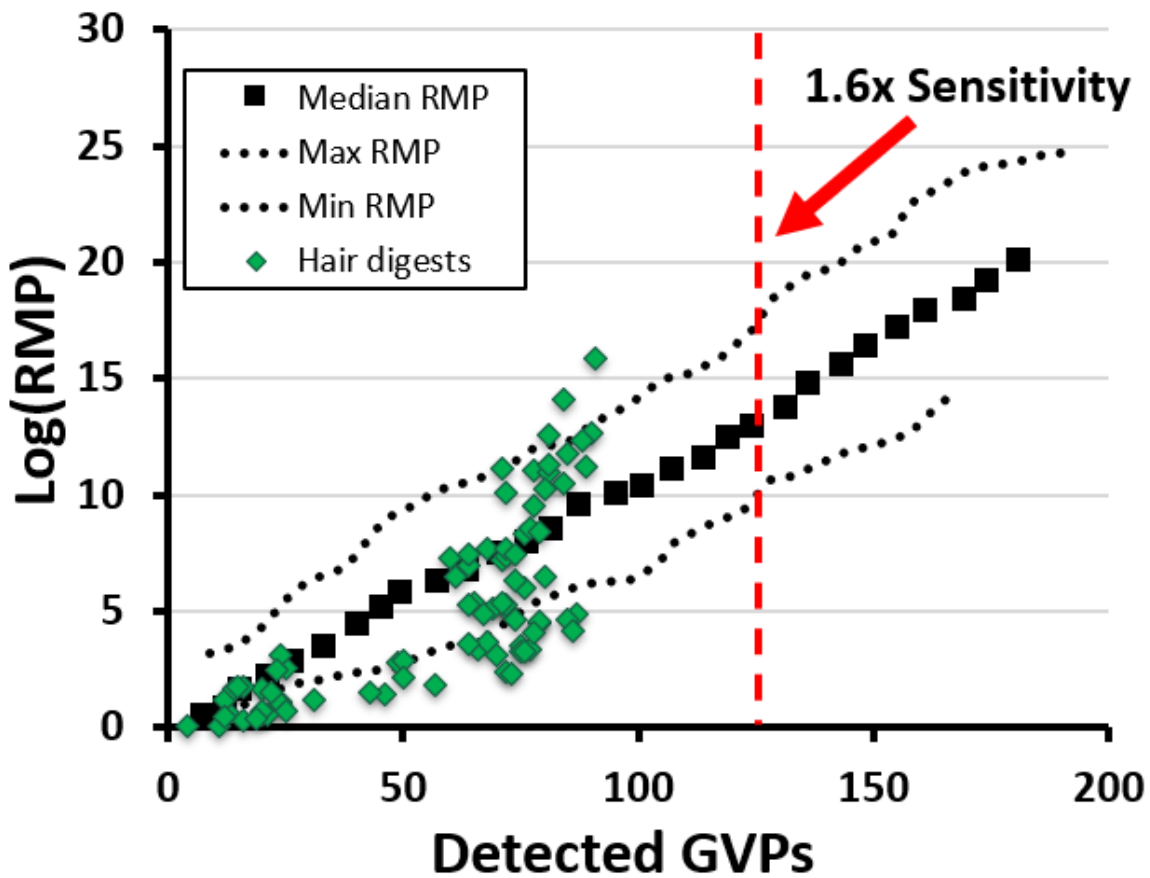

930

931 Figure 4. **MCMC model for RMP extrapolation.** A Markov Chain Monte Carlo model was developed to  
932 estimate random match probability as a function of GVP detection. After 100 iterations, the maximum,  
933 minimum, and median values were obtained. RMP values were validated from digests of 2 cm of hair  
934 shaft. QQQ detection is estimated to increase GVP detection by 1.6-fold and QuanDirect™ detection is  
935 estimated to increase GVP detection by 1.3-fold.

936

937

938

939

940

941

942

943
